# Supplementary material for: Arthroscopic-assisted balloon tibioplasty versus open reduction internal fixation (ORIF) for treatment of Schatzker II–IV tibial plateau fractures: study protocol of a randomised controlled trial
Source: PubMed Central journal article supplement — BMJ Open. 2018 Aug 8;8(8):e021667. doi: 10.1136/bmjopen-2018-021667 (PMC6089321; doi:10.1136/bmjopen-2018-021667), 2018-08-08
Supplement: bmjopen-2018-021667.draft_revisions.pdf [file bmjopen-2018-021667.draft_revisions.pdf]

# BMJ Open

BMJ Open is committed to open peer review. As part of this commitment we make the peer review history of every article we publish publicly available.

When an article is published we post the peer reviewers' comments and the authors' responses online. We also post the versions of the paper that were used during peer review. These are the versions that the peer review comments apply to.

The versions of the paper that follow are the versions that were submitted during the peer review process. They are not the versions of record or the final published versions. They should not be cited or distributed as the published version of this manuscript.

BMJ Open is an open access journal and the full, final, typeset and author-corrected version of record of the manuscript is available on our site with no access controls, subscription charges or pay-per-view fees (<http://bmjopen.bmj.com>).

If you have any questions on BMJ Open's open peer review process please email [info.bmjopen@bmj.com](mailto:info.bmjopen@bmj.com)

# BMJ Open

## Balloon tibioplasty vs ORIF for the treatment of Schatzker II-IV Tibial Plateau Fractures : a study protocol of randomised controlled trial

|                               |                                                                                                                                                                                                                                                                                                                                                                                                                                                      |
|-------------------------------|------------------------------------------------------------------------------------------------------------------------------------------------------------------------------------------------------------------------------------------------------------------------------------------------------------------------------------------------------------------------------------------------------------------------------------------------------|
| Journal:                      | <i>BMJ Open</i>                                                                                                                                                                                                                                                                                                                                                                                                                                      |
| Manuscript ID                 | bmjopen-2018-021667                                                                                                                                                                                                                                                                                                                                                                                                                                  |
| Article Type:                 | Protocol                                                                                                                                                                                                                                                                                                                                                                                                                                             |
| Date Submitted by the Author: | 12-Jan-2018                                                                                                                                                                                                                                                                                                                                                                                                                                          |
| Complete List of Authors:     | Wang, Ji-Qi; Department of Orthopaedics<br>Jiang, Bing-Jie; The Second Affiliated Hospital of Wenzhou Medical University<br>Guo, Wei-Jun; The Second Affiliated Hospital of Wenzhou Medical University<br>Zhang, Wei-Jiang; The Second Affiliated Hospital of Wenzhou Medical University<br>Li, A-Bing; The Second Affiliated Hospital of Wenzhou Medical University<br>Zhao, You-Ming; The Second Affiliated Hospital of Wenzhou Medical University |
| Keywords:                     | ORTHOPAEDIC & TRAUMA SURGERY, Knee < ORTHOPAEDIC & TRAUMA SURGERY, Adult orthopaedics < ORTHOPAEDIC & TRAUMA SURGERY                                                                                                                                                                                                                                                                                                                                 |
|                               |                                                                                                                                                                                                                                                                                                                                                                                                                                                      |

SCHOLARONE™  
Manuscripts

1  
2  
3 **Title: Balloon tibioplasty vs ORIF for the treatment of Schatzker II-IV Tibial Plateau**  
4 **Fractures : a study protocol of randomised controlled trial**  
5

6 Ji-Qi Wang<sup>1</sup>, Bing-Jie Jiang<sup>1</sup>, Wei-Jun Guo<sup>1</sup>, Wei-Jiang Zhang<sup>1</sup>, A-Bing Li<sup>1</sup>, You-Ming Zhao<sup>1</sup>  
7

8 Institutional affiliations:  
9

10 <sup>1</sup>Department of Orthopaedics, The Second Affiliated Hospital of Wenzhou Medical University, 109#  
11 Xue Yuan Xi Road, Wenzhou, Zhejiang, China, 325000.  
12

13 **Corresponding author:** You-Ming Zhao, E-mail: wmuorthopaedic@sina.com  
14  
15

16  
17 **Abstract**

18 **Introduction:** Balloon tibioplasty as an emerging technology, and has shown its  
19 advantages on recovering the depression of the articular surface. However, the  
20 clinical outcomes of balloon tibioplasty and ORIF are insufficient. This is the first  
21 randomised study to compare balloon tibioplasty against traditional ORIF and will  
22 provide guidance for treating patients with schatzker II-IV tibial plateau fractures.  
23

24 **Methods and analysis:** A blinded randomised controlled trial will be conduct and a  
25 total of 100 participants with schatzker II-IV tibial plateau fracture will be randomly  
26 divided to either the balloon tibioplasty group or the ORIF group at a ratio of 1:1. The  
27 primary clinical outcome measures are the knee functional scores and the  
28 percentage of satisfactory recovered joint area. Secondary clinical outcome measures  
29 are intraoperative blood loss, operation time, VAS scores after surgery, length of  
30 hospital stay after surgery, fracture healing time and complications.  
31

32 **Ethics and dissemination:** This study has been reviewed and approved by the  
33 Institutional Review Board of the Second Affiliated Hospital of Wenzhou Medical  
34 University (batch: 2017-12). The results will be presented in peer-reviewed journals  
35 after completion of the study.  
36

37 Trial registration number: NCT03327337, Pre-results  
38

39 **Introduction**

40 Tibial plateau fractures are complex intra-articular and metaphyseal lesions,  
41 accounting for 1-2% of all fractures[1], caused by either a valgus or varus force in  
42 combination with axial force[2]. The acknowledged operative indication was  
43 depressed fragments greater than 10 mm or instability >10° in a fully extended  
44 knee[3]. Many classification systems have been developed for tibial plateau fractures  
45 and used for preoperative planning and prognosis[4]. The Schatzker classification  
46 system is rather simple and widely used among orthopaedic surgeons in clinical  
47 practice. Schatzker II-IV tibial plateau fractures includes lateral or medial depressed  
48 articular fragments, the loss of joint congruity in these injuries has been shown to  
49 carry a poor prognosis such as posttraumatic arthrosis and valgus deformity despite  
50 proper management, so restoration of the joint surface is the goal of surgery[5-7].  
51 The traditional ORIF treatment has a series of demerits, for instance, too much  
52 damage, the limited exposure of articular cavity, the insufficient diagnosis and  
53 treatment for the internal joint injury[8].  
54  
55  
56  
57  
58  
59  
60

1  
2  
3 In recent years, with the development of technology, the treatment concept of tibial  
4 plateau fractures has developed from original mechanical fixation to biomechanical  
5 fixation and minimally invasive surgical[9], borrowing from the successful vertebral  
6 kyphoplasty technique, scholars put forward arthroscopic assisted balloon  
7 tibioplasty[10], a novel minimally invasive technique for the reduction of depressed  
8 tibial plateau fractures. Balloon tibioplasty as an emerging technology, which aims to  
9 visualize the articular surface and use balloon distension tibial plasty assisted by  
10 arthroscope to recover the depression of the articular surface, and then fixed the  
11 fracture according to patient's specific fracture type[11]. This technology has shown  
12 its advantages on recovering the depression of the articular surface[12], treating  
13 additional intraarticular lesions during the operation, and minimizing surgical trauma.  
14 Furthermore, under fluoroscopic, optimal centering of the expanding tibioplasty  
15 balloon allows a widespread and continuously increasing reduction force to the  
16 fracture area[13]. However, there are some factors influencing the clinical promotion  
17 of this surgical technique, for example, the application time of this surgical technique is  
18 short, the large number of case data and long-term follow-up is lacking, and the cost  
19 of operation is higher than traditional ORIF[14].

20  
21 Esmat Elabjer et al[15] examined the outcomes of arthroscopically-assisted reduction  
22 and internal fixation (ARIF) vs ORIF for the treatment of Schatzker I–III tibial plateau  
23 fractures, they showed that ARIF has a statistically significant less duration of hospital  
24 stay, both ARIF and ORIF can provide good results, in addition ARIF offer a more  
25 precise evaluation and treatment of associated intraarticular lesions. Ollivier et al[16]  
26 showed that the use of balloon guided inflation tibioplasty with injection of a  
27 resorbable bone substitute is safe, and results in a high rate of anatomic reduction  
28 and good clinical outcomes in patients with depressed tibial plateau fractures.

29  
30 As we all know, no randomised controlled study of the clinical outcomes of balloon  
31 tibioplasty vs ORIF has been performed and high-quality RCTs are often deemed to  
32 be the gold standard for clinical research. In this study, we will perform an RCT to  
33 compare balloon tibioplasty and traditional ORIF.

### 34 **Methods and design**

35  
36 This study is approved by the Institutional Ethics Review Board of the Second  
37 Affiliated Hospital of Wenzhou Medical University and conforms to the Declaration of  
38 Helsinki. All the patients provided informed consent to participate in this study. This  
39 trial has been registered at the US National Institutes of Health Clinical Trials Registry:  
40 NCT03327337. The protocol conforms to the Standard Protocol Items  
41 Recommendations for Interventional Trials. Figure 1 provides the chart of the trial  
42 design.

### 43 **Participants**

44  
45 This study is a parallel group RCT conducted at the department of orthopaedics, the  
46 Second Affiliated Hospital of Wenzhou Medical University. The diagnosis of tibial  
47 plateau fracture was made on AP and lateral X-rays, CT scan was used to classify it.

### 48 **Inclusion criteria**

49  
50 (1) fresh closed fracture, X-ray and CT scan showing Schatzker type II-IV tibial plateau  
51 fracture  
52  
53

1  
2  
3 (2) no history of knee-joint dislocation or other knee trauma

4 (3) no previous surgery on the knee

5 (4) the informed consent form signed

6 (5) age from 18 to 80 years

7  
8 **Exclusion criteria**

9 (1) other types (Schatzker type I, V, and VI) of tibial plateau fracture

10 (2) open fractures, pathological fractures, immunodeficiency, hematological diseases  
11 and severe hepatorenal disorders

12 (3) the informed consent form unsigned

13  
14 **Randomisation and blinding**

15 Pre-randomisation eligibility checks will be carried out to ensure that participants are  
16 eligible for study inclusion. A computerised randomisation was performed and the  
17 participants were divided into two groups by a sealed envelope: one group was  
18 treated with balloon tibioplasty and the other with ORIF. The patient and trial  
19 statistician were blinded until the last questionnaires have been completed.

20  
21 **Interventions**

22 Balloon tibioplasty group:

23 Preoperative preparation: After the success continuous epidural anesthesia, the  
24 patients were placed in supine position with elevation of the affected knee slightly  
25 flexed at 45 degrees. The conventional arthroscopic approach was used to check  
26 the patient's joint cavity carefully and hemorrhage was removed, and combined  
27 ligament injury was explored. If combined with anterior or posterior cruciate  
28 ligament injury, we would reconstruct the ligament firstly.

29  
30 Step 1: If there is a splitting tibial plateau fracture, an incision would be made in  
31 proximal tibia according to the fracture type. A small locking T-plate would be placed  
32 using minimally invasive techniques, then a temporary cortical bone screw would be  
33 pre-placed for prevention of cortical rupture when the balloon was enlarged. The  
34 temporary fixation of cortical bone screw permitted further adjustment on the  
35 position of the plate. If there is no splitting tibial plateau fracture, proceed to step 2  
36 directly.

37  
38 Step 2: 3 kirschner wires were placed under fluoroscopy on a surface locating below  
39 the depressed fragments. The suitable position for placing the balloon was  
40 predetermined under fluoroscopy. Then the surgeon gradually inflated the balloon  
41 with contrast solution and elevated the fragment till it was visually anatomically  
42 reduced on a true AP fluoroscopic view. Then the arthroscope was used to make  
43 sure the anatomical reduction. If not, the balloon would be deflated, repositioned,  
44 and re-inflated to reduce the persistent depression. After balloon removal, we carefully  
45 injected calcium phosphate cement to the balloon-created cavity under fluoroscopic,  
46 making sure no excessive cement overflowed into the tibial medullary cavity. We  
47 took out the 3 kirschner wires, inserted the rest screws, and finally sutured the  
48 incision.

49  
50  
51  
52  
53 **ORIF group:**

54 Preoperative preparation: After the success continuous epidural anesthesia, the  
55 patients were placed in supine position with elevation of the affected knee slightly

1  
2  
3 flexed at 45 degrees. The patients were treated with traditional Open Reduction and  
4 Internal Fixation(ORIF) and bone graft.

5 The patients were allowed to bear no weight within 4 weeks. 6-8 weeks after the  
6 operation, the patients were allowed to walk with sticks until the fracture was  
7 completely healed.  
8

### 9 **Outcome measurements**

#### 10 **Primary Outcome Measure:**

11 1.The knee functional scores after surgery will be assessed by the Rasmussen scores  
12 of knee function. The Rasmussen scores will be recorded at 1、 2、 3、 6、 12 and 24  
13 mouths postoperatively.

14  
15 2.The percentage of satisfactory recovered joint area after operation will be assessed  
16 by the CT scan at 1、 2、 3、 6、 12 and 24 mouths postoperatively.  
17

#### 18 **Secondary Outcome Measures:**

19 1.The Intraoperative blood loss will be recorded in the anesthesia records, which  
20 included the blood in suction bottles (after subtracting the lavage fluid used during  
21 the surgery) and in weighed sponges that were used during the operation.  
22

23 2.Operation time.

24 3.The pain degree of lower limb after surgery will be assessed by the VAS scores. The  
25 scores of VAS of leg pain will be recorded from operation day to leave hospital day(up  
26 to 2 weeks).

27 4. length of hospital stay after surgery.

28 5.Fracture healing time.

29 6.complications.  
30

#### 31 **Follow-up**

32 Follow-up will be conducted at 1,2,3,6,12 and 24 months postoperatively.  
33

#### 34 **Monitoring**

35 All investigators who have completed training could independently collect the data  
36 and assess the clinical outcomes. Safety and data monitoring will be performed  
37 periodically during the study. All paper and electronic data will be stored for 10 years  
38 in the secure research archives at the Second Affiliated Hospital of Wenzhou Medical  
39 University with restricted access.  
40

#### 41 **Sample size**

42 In order to pilot this study, the investigators have decided to recruit 50 patients into  
43 each arm of the trial and allow for a dropout rate of 20% for an effective sample size  
44 of 40 patients in each arm. The sample size is considered adequate to verify the  
45 research hypothesis.  
46

#### 47 **Statistical analysis**

48 The trial data will be calculated by the SPSS V.19.0 software. Differences in the  
49 operative time and intraoperative blood loss, the percentage of joint area recovered  
50 satisfactory, and complications between 2 groups will be analysed by two  
51 independent-samples t-tests. VAS scores and Rasmussen scores will be analysed by a  
52 repeated-measures analysis of variance. Changes in the data between different  
53 follow-up time points and the baseline will also be calculated, and the changes in  
54 data between 2 groups will be assessed by two independent-samples t-tests.  
55  
56  
57  
58  
59  
60

## Discussion

1  
2  
3  
4  
5  
6  
7  
8  
9  
10  
11  
12  
13  
14  
15  
16  
17  
18  
19  
20  
21  
22  
23  
24  
25  
26  
27  
28  
29  
Ideal treatment of schatzker II-IV tibial plateau fracture not only has to achieve anatomical restoration of joint surface to prevent cartilage damage and post-traumatic arthritis, but also rigid fixation to allow early post-operative rehabilitation[17]. Balloon tibioplasty is reported as a minimally invasive technique, which creating a symmetric, contained defect to hold a bone filler for subchondral support, and the balloon allows access to the posterior compressions while eliminating the neurological and vascular risks of a conventional approach[14]. This technique has already been used for kyphoplasty and maxillofacial surgery, and recently used for tibial plateau fractures[18]. This paper describes the protocol for conducting an RCT in China that will investigate the efficacy of balloon tibioplasty in treating schatzker II-IV tibial plateau fractures. In this trial, we designed a ORIF group as a controlled group to identify the clinical outcomes of schatzker II-IV tibial plateau fractures with balloon tibioplasty fixation. It is hypothesised that balloon tibioplasty, compared with ORIF, is superior in reducing disability and thus has a better clinical outcome. This study is the first RCT to compare schatzker II-IV tibial plateau fractures with balloon tibioplasty against traditional ORIF in china. In the case that our hypothesis is confirmed, our consequences will have an important value in the schedule and development of treatment options in schatzker II-IV tibial plateau fractures surgery. We anticipate that the results will provide more reliable evidence and clarify the value of balloon tibioplasty as a treatment for patients with schatzker II-IV tibial plateau fractures.

## Contributors

30  
31  
32  
33  
34  
35  
36  
37  
38  
39  
40  
41  
42  
43  
44  
45  
46  
47  
48  
49  
50  
51  
52  
53  
54  
55  
56  
57  
58  
59  
60  
Ji-Qi Wang helped to design the trial and wrote the manuscript. Bing-Jie Jiang helped to design the trial. Wei-Jun Guo helped to conceive the trial and revised the manuscript. Wei-Jiang Zhang recruit the patients and conduct the trial. A-Bing Li will planned the statistical analysis. You-Ming Zhao helped to design the study and critically revised the manuscript. All authors read and approved the final manuscript.

## Funding

This work is supported by Clinical scientific research project of the Second Affiliated Hospital of the Wenzhou Medical University (SAHoWMU-CR2017-08-105).

The funders had no role in the design, execution or writing of the study.

## Competing interests

None declared.

## Patient consent

Obtained.

## Ethics approval

The study had been reviewed and approved by the ethics committee of the Second Affiliated Hospital of the Wenzhou Medical University, Wenzhou, China (batch: 2017-12).

## References

1. McNamara IR, Smith TO, Shepherd KL, Clark AB, Nielsen DM, Donell S, Hing CB (2015) Surgical fixation methods for tibial plateau fractures. The Cochrane database



- of systematic reviews (9):Cd009679. doi:10.1002/14651858.CD009679.pub2
2. Mayr R, Attal R, Zwierzina M, Blauth M, Schmoelz W (2015) Effect of additional fixation in tibial plateau impression fractures treated with balloon reduction and cement augmentation. *Clinical biomechanics (Bristol, Avon)* 30 (8):847-851. doi:10.1016/j.clinbiomech.2015.05.016
3. Ringus VM, Lemley FR, Hubbard DF, Wearden S, Jones DL (2010) Lateral tibial plateau fracture depression as a predictor of lateral meniscus pathology. *Orthopedics* 33 (2):80-84. doi:10.3928/01477447-20100104-05
4. Maripuri SN, Rao P, Manoj-Thomas A, Mohanty K (2008) The classification systems for tibial plateau fractures: how reliable are they? *Injury* 39 (10):1216-1221. doi:10.1016/j.injury.2008.01.023
5. Chen HW, Liu GD, Wu LJ (2015) Clinical and radiological outcomes following arthroscopic-assisted management of tibial plateau fractures: a systematic review. *Knee surgery, sports traumatology, arthroscopy : official journal of the ESSKA* 23 (12):3464-3472. doi:10.1007/s00167-014-3256-2
6. Egol KA, Cantlon M, Fisher N, Broder K, Reigo A (2017) Percutaneous Repair of a Schatzker III Tibial Plateau Fracture Assisted by Arthroscopy. *Journal of orthopaedic trauma* 31 Suppl 3:S12-s13. doi:10.1097/bot.0000000000000892
7. Craiovan BS, Keshmiri A, Springorum R, Grifka J, Renkawitz T (2014) [Minimally invasive treatment of depression fractures of the tibial plateau using balloon repositioning and tibioplasty: video article]. *Der Orthopade* 43 (10):930-933. doi:10.1007/s00132-014-3019-2
8. Dall'oca C, Maluta T, Lavini F, Bondi M, Micheloni GM, Bartolozzi P (2012) Tibial plateau fractures: compared outcomes between ARIF and ORIF. *Strategies in trauma and limb reconstruction (Online)* 7 (3):163-175. doi:10.1007/s11751-012-0148-1
9. Kampa J, Dunlay R, Sikka R, Swiontkowski M (2016) Arthroscopic-Assisted Fixation of Tibial Plateau Fractures: Patient-Reported Postoperative Activity Levels. *Orthopedics* 39 (3):e486-491. doi:10.3928/01477447-20160427-03
10. Pizanis A, Garcia P, Pohlemann T, Burkhardt M (2012) Balloon tibioplasty: a useful tool for reduction of tibial plateau depression fractures. *Journal of orthopaedic trauma* 26 (7):e88-93. doi:10.1097/BOT.0b013e31823a8dc8
11. Ziogas K, Tourvas E, Galanakis I, Kouvidis G (2015) Arthroscopy Assisted Balloon Osteoplasty of a Tibia Plateau Depression Fracture: A Case Report. *North American journal of medical sciences* 7 (9):411-414. doi:10.4103/1947-2714.166223
12. Jentsch T, Fritz Y, Veit-Haibach P, Schmitt J, Sprengel K, Werner CM (2015) Osseous vitality in single photon emission computed tomography/computed tomography (SPECT/CT) after balloon tibioplasty of the tibial plateau: a case series. *BMC medical imaging* 15:56. doi:10.1186/s12880-015-0091-y
13. Di Caprio F, Buda R, Ghermandi R, Ferruzzi A, Timoncini A, Parma A, Giannini S (2010) Combined arthroscopic treatment of tibial plateau and intercondylar eminence avulsion fractures. *The Journal of bone and joint surgery American volume* 92 Suppl 2:161-169. doi:10.2106/jbjs.j.00812
14. Mauffrey C, Roberts G, Cuellar DO, Herbert B, Hak D (2014) Balloon tibioplasty: pearls and pitfalls. *The journal of knee surgery* 27 (1):31-37.



1  
2  
3 doi:10.1055/s-0033-1363516

4 15. Elabjer E, Bencic I, Cuti T, Cerovecki T, Curic S, Vidovic D (2017) Tibial plateau  
5 fracture management: arthroscopically-assisted versus ORIF procedure - clinical and  
6 radiological comparison. Injury 48 Suppl 5:S61-s64.  
7 doi:10.1016/s0020-1383(17)30742-8

8 16. Ollivier M, Turati M, Munier M, Lunebourg A, Argenson JN, Parratte S (2016)  
9 Balloon tibioplasty for reduction of depressed tibial plateau fractures: Preliminary  
10 radiographic and clinical results. International orthopaedics 40 (9):1961-1966.  
11 doi:10.1007/s00264-015-3047-5

12 17. Rossi R, Bonasia DE, Blonna D, Assom M, Castoldi F (2008) Prospective follow-up  
13 of a simple arthroscopic-assisted technique for lateral tibial plateau fractures: results  
14 at 5 years. The Knee 15 (5):378-383. doi:10.1016/j.knee.2008.04.001

15 18. Doria C, Balsano M, Spiga M, Mosele GR, Puddu L, Caggiari G (2017) Tibioplasty, a  
16 new technique in the management of tibial plateau fracture: A multicentric  
17 experience review. Journal of orthopaedics 14 (1):176-181.  
18 doi:10.1016/j.jor.2016.12.002

19  
20  
21  
22  
23  
24 Figure 1. Flow chart showing the steps in participant recruitment, treatment and  
25 analysis. balloon tibioplasty, arthroscopic assisted balloon tibioplasty group; ORIF,  
26 open reduction and internal fixation group.  
27  
28  
29  
30  
31  
32  
33  
34  
35  
36  
37  
38  
39  
40  
41  
42  
43  
44  
45  
46  
47  
48  
49  
50  
51  
52  
53  
54  
55  
56  
57  
58  
59  
60

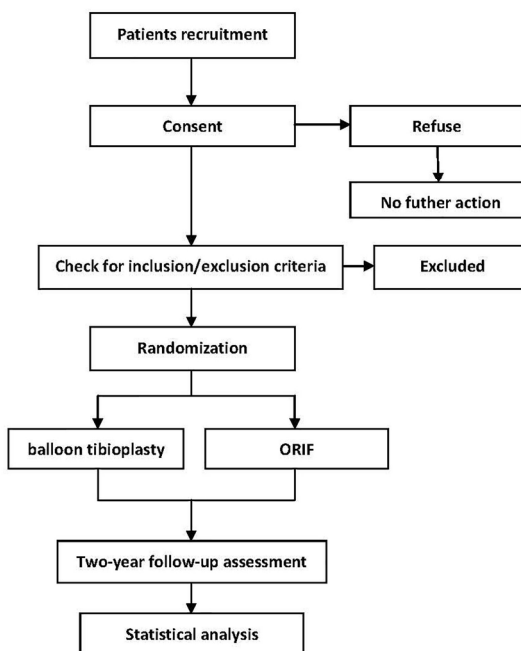

Flow chart showing the steps in participant recruitment, treatment and analysis. balloon tibioplasty, arthroscopic assisted balloon tibioplasty group; ORIF, open reduction and internal fixation group.

189x170mm (300 x 300 DPI)

# BMJ Open

## Arthroscopic-assisted balloon tibioplasty versus open reduction internal fixation (ORIF) for treatment of Schatzker II–IV tibial plateau fractures: Study protocol of a randomized controlled trial

|                                 |                                                                                                                                                                                                                                                                                                                                                                                                                                                      |
|---------------------------------|------------------------------------------------------------------------------------------------------------------------------------------------------------------------------------------------------------------------------------------------------------------------------------------------------------------------------------------------------------------------------------------------------------------------------------------------------|
| Journal:                        | <i>BMJ Open</i>                                                                                                                                                                                                                                                                                                                                                                                                                                      |
| Manuscript ID                   | bmjopen-2018-021667.R1                                                                                                                                                                                                                                                                                                                                                                                                                               |
| Article Type:                   | Protocol                                                                                                                                                                                                                                                                                                                                                                                                                                             |
| Date Submitted by the Author:   | 18-Apr-2018                                                                                                                                                                                                                                                                                                                                                                                                                                          |
| Complete List of Authors:       | Wang, Ji-Qi; Department of Orthopaedics<br>Jiang, Bing-Jie; The Second Affiliated Hospital of Wenzhou Medical University<br>Guo, Wei-Jun; The Second Affiliated Hospital of Wenzhou Medical University<br>Zhang, Wei-Jiang; The Second Affiliated Hospital of Wenzhou Medical University<br>Li, A-Bing; The Second Affiliated Hospital of Wenzhou Medical University<br>Zhao, You-Ming; The Second Affiliated Hospital of Wenzhou Medical University |
| <b>Primary Subject Heading</b>: | Surgery                                                                                                                                                                                                                                                                                                                                                                                                                                              |
| Secondary Subject Heading:      | Sports and exercise medicine, Surgery                                                                                                                                                                                                                                                                                                                                                                                                                |
| Keywords:                       | ORTHOPAEDIC & TRAUMA SURGERY, Knee < ORTHOPAEDIC & TRAUMA SURGERY, Adult orthopaedics < ORTHOPAEDIC & TRAUMA SURGERY                                                                                                                                                                                                                                                                                                                                 |
|                                 |                                                                                                                                                                                                                                                                                                                                                                                                                                                      |

SCHOLARONE™  
Manuscripts

1  
2  
3 **1 Arthroscopic-assisted balloon tibioplasty versus open reduction internal fixation (ORIF) for**  
4 **2 treatment of Schatzker II–IV tibial plateau fractures: Study protocol of a randomized**  
5 **3 controlled trial**  
6  
7 4

8 5 Ji-Qi Wang<sup>1</sup>, Bing-Jie Jiang<sup>1</sup>, Wei-Jun Guo<sup>1</sup>, Wei-Jiang Zhang<sup>1</sup>, A-Bing Li<sup>1</sup>, You-Ming Zhao<sup>1</sup>  
9

10 6 Institutional affiliations:

11 7 <sup>1</sup>Department of Orthopaedics, The Second Affiliated Hospital of Wenzhou Medical University,  
12  
13 109# Xue Yuan Xi Road, Wenzhou, Zhejiang, China, 325000.  
14  
15

16  
17 9 **Corresponding author:** You-Ming Zhao, E-mail: [wmuorthopaedic@sina.com](mailto:wmuorthopaedic@sina.com)

18  
19 10 Address: 109# Xue Yuan Xi Road, Wenzhou, Zhejiang, China, 325000  
20  
21

22 12 Keywords: Tibial plateau fracture; Arthroscopic-assisted surgery; Balloon tibioplasty; Open  
23 13 Reduction Internal Fixation; Protocol  
24  
25

26 15 Word count: 2467  
27  
28

29 17 Abstract

30 18 Introduction: Arthroscopic-assisted balloon tibioplasty is an emerging technology that has shown  
31 19 advantages in recovering depression of the articular surface. However, arthroscopic-assisted  
32 20 balloon tibioplasty does not produce sufficiently beneficial clinical outcomes. This is the first  
33 21 randomized study to compare arthroscopic-assisted balloon tibioplasty with traditional open  
34 22 reduction internal fixation (ORIF), and will provide guidance for treating patients with Schatzker  
35 23 II–IV tibial plateau fractures.

36 24 Methods and analysis: A blinded randomized controlled trial will be conducted and a total of 80  
37 25 participants with Schatzker II–IV tibial plateau fracture will be randomly divided into either the  
38 26 arthroscopic-assisted balloon tibioplasty group or the ORIF group, at a ratio of 1:1. The primary  
39 27 clinical outcome measures are the knee functional scores, Rasmunssen radiological evaluation  
40 28 scores, and the quality of reduction based on postoperative computed tomography scan. Secondary  
41 29 clinical outcome measures are intraoperative blood loss, surgical duration, visual analog scale  
42 30 score after surgery, hospital duration after surgery, complications, and SF-36 score.

43 31 Ethics and dissemination: This study has been reviewed and approved by the Institutional Review  
44 32 Board of the Second Affiliated Hospital of Wenzhou Medical University (batch: 2017-12). The  
45 33 results will be presented in peer-reviewed journals after completion of the study.

46 34 Trial registration number: NCT03327337, Pre-results

47 35 Strengths and limitations of this study: This trial is designed to have a feasible, comparative  
48 36 effectiveness trial design that has similarities to common clinical situations. This study is the first  
49 37 RCT to compare the outcomes of Schatzker II–IV tibial plateau fractures between  
50 38 arthroscopic-assisted balloon tibioplasty and traditional ORIF in China. The size of the study  
51 39 sample limits the power of the observations.  
52  
53  
54  
55  
56  
57  
58  
59  
60

## 1 Introduction

2 Tibial plateau fractures are complex intraarticular and metaphyseal lesions, accounting for 1–2%  
3 of all fractures [1] caused by either a valgus or varus force in combination with an axial force [2].  
4 The acknowledged surgical indication for a tibial plateau fracture is tilt or valgus malalignment  
5 exceeding 5°, articular step-off exceeding 3 mm, or condylar widening exceeding 5 mm (lateral  
6 tibial plateau fracture), or tilt or any displacement (medial tibial plateau fracture) [3]. Many  
7 classification systems have been developed for tibial plateau fractures and are used for  
8 preoperative planning and prognostic purposes [4-6]. The Schatzker classification system is  
9 simple and widely used among orthopedic surgeons in clinical practice. Schatzker II–IV tibial  
10 plateau fractures include lateral or medial depressed articular fragments, and loss of joint  
11 congruity in these injuries is associated with a poor prognosis, such as posttraumatic arthrosis and  
12 valgus deformity despite proper management. Therefore, restoration of the joint surface is the goal  
13 of surgery [7-9].

14 Open reduction internal fixation (ORIF) for treatment of this type of fracture has yielded  
15 promising results. Gavaskar *et al.* [10] reported that ORIF could achieve satisfactory radiological  
16 and functional results in split depression lateral tibial plateau fractures. After ORIF for 15 cases of  
17 medial tibial plateau fractures, Morin *et al.* [11] reported that 93% of patients were satisfied or  
18 very satisfied with their functional recovery and there were no cases of pseudarthrosis or  
19 secondary varus displacement. However, traditional ORIF treatment has a number of  
20 disadvantages, e.g., excessive damage, limited exposure of the articular cavity, and insufficient  
21 ability to diagnose and address internal joint injury [12].

22 With recent technological advances, the treatment concept of tibial plateau fractures has  
23 progressed from mechanical fixation to minimally invasive surgical interventions for  
24 biomechanical stability [13,14]. Based on the success of vertebral kyphoplasty, arthroscopic  
25 assisted balloon tibioplasty [15] has been developed as a novel minimally invasive technique for  
26 reducing depressed tibial plateau fractures. Arthroscopic-assisted balloon tibioplasty is an  
27 emerging technology that aims to visualize the articular surface, and uses balloon distension tibial  
28 plasty assisted by arthroscopy to recover depression of the articular surface and fix the fracture  
29 according to its specific type [16]. This technology has shown advantages in recovering  
30 depression of the articular surface [17], treating additional intraarticular lesions during the  
31 operation, and minimizing surgical trauma. Furthermore, under fluoroscopy, optimal centering of  
32 the expanding tibioplasty balloon allows a widespread and continuously increasing reduction force  
33 to be applied to the fracture area [18]. Primary data from Ollivier *et al.* [19] showed that depressed  
34 tibial plateau fractures treated with arthroscopic-assisted balloon tibioplasty had a high rate of  
35 anatomic reduction and good clinical outcomes. Similar results were also reported by Pizanis *et al.*  
36 [15] using arthroscopic-assisted balloon tibioplasty without classic fenestration of the tibia, which  
37 would minimize surgical trauma. However, a number of factors influence the clinical adoption of  
38 this surgical technique: the application time of is short, there is a paucity of case data and  
39 information regarding long-term follow-up, and the cost of operation is higher than traditional  
40 ORIF [20].

41 To our knowledge, there have been no randomized controlled trials (RCTs) of the clinical  
42 outcomes of arthroscopic-assisted balloon tibioplasty versus ORIF, where high-quality RCTs are  
43 generally deemed to be the gold standard in clinical research. In this study, we will perform an  
44 RCT to compare arthroscopic-assisted balloon tibioplasty and traditional ORIF.

## 1 Methods and design

2 This study has been approved by the Ethics Committee of the Second Affiliated Hospital of  
3 Wenzhou Medical University, and conforms to the Declaration of Helsinki. All patients will  
4 provide informed consent prior to participation in this study. This trial has been registered at the  
5 US National Institutes of Health Clinical Trials Registry (NCT03327337). The protocol conforms  
6 to the Standard Protocol Items Recommendations for Interventional Trials. Figure 1 shows a chart  
7 of the trial design.

## 8 Participants

9 This study is a parallel group RCT conducted at the Department of Orthopaedics, the Second  
10 Affiliated Hospital of Wenzhou Medical University. Fractures will be evaluated on anteroposterior  
11 (AP) and laterolateral (LL) radiographs and by computed tomography (CT), which can analyze the  
12 fracture pattern more precisely.

## 13 Inclusion criteria

14 (1) Acute closed fractures less than 10 days old, and X-ray and CT scan showing Schatzker type II,  
15 III or IV with depression of the medial tibial plateau only. (supplementary information, S1)

16 (2) No history of knee joint dislocation or other knee trauma.

17 (3) Signed informed consent.

18 (4) Age of 18–80 years.

## 19 Exclusion criteria

20 (1) Other types of tibial plateau fracture (Schatzker type I, IV with split or comminute fracture, V,  
21 and VI).

22 (2) Concomitant injuries that will interfere with functional recovery, such as combined fracture of  
23 the lower limb.

24 (3) Open fractures, pathological fractures, immunodeficiency, hematological diseases, or severe  
25 hepatorenal disorders.

## 26 Patient involvement

27 The design of this study was not directly involved in the patients, and the intervention in this study  
28 is not considered to change the patient's direct perception of the preoperative and intraoperative  
29 processes or the postoperative rehabilitation therapy. As the enrolment in study may influence the  
30 patient's view of the clinical work or even feel like a burden, the patients will be interviewed  
31 randomly to identify adverse effects. The results will be informed by mail to all the patients  
32 involved.

## 33 Randomization and blinding

34 Pre-randomization eligibility checks will be carried out to ensure that participants are eligible for  
35 inclusion in the study. Patients will be randomly assigned to one of two groups (experimental or  
36 control) using a computer-generated random assignment in a 1:1 ratio, and allocation will be  
37 concealed until the point of randomization. Patients, researchers performing the follow-up  
38 measurements, and the trial statistician will be blinded to the group allocations until the last  
39 questionnaires have been completed.

## 40 Interventions

41 Arthroscopic-assisted balloon tibioplasty group:

42 Step 1: In cases with a splitting tibial plateau fracture (Schatzker type II), an incision will be made  
43 in the proximal tibia according to the fracture type, for placement of a small locking T-plate  
44 (Synthes, Freiburg, Germany) using minimally invasive techniques. Then, a temporary cortical

1  
2  
3 1 bone screw will be inserted to prevent cortical rupture when the balloon is enlarged. Temporary  
4 2 fixation of the cortical bone screw will permit further adjustment of the position of the plate. In  
5 3 cases with no splitting tibial plateau fracture (Schatzker type III or IV with depression of the  
6 4 medial tibial plateau only), we will proceed to step 2 directly.

7  
8 5 Step 2: Three Kirschner wires (2 mm) will be placed below the depressed fragment under  
9 6 fluoroscopy. Using live fluoroscopy, the balloon will be placed in the optimal position and slowly  
10 7 inflated with contrast solution (Ultravist®; Schering, Berlin, Germany). The arthroscope will then  
11 8 be used to confirm anatomical reduction of the depressed fragment. The balloon will be deflated,  
12 9 repositioned, and reinflated to reduce the persistent depression. After removal of the balloon, we  
13 10 will use a Kirschner wire (2 mm) to temporarily lift the depressed fragment and carefully inject  
14 11 calcium phosphate cement (Osteopal® V; Heraeus Medical GmbH, Wehrheim, Germany) into the  
15 12 cavity produced by the balloon under fluoroscopic guidance, ensuring there is no excessive  
16 13 cement overflow into the tibial medullary cavity. (supplementary information, S2)

17  
18  
19 14 ORIF group:

20 15 For this technique, a lateral or medial surgical approach will be used according to the type of  
21 16 fracture. The depressed fragment will be elevated by a metal tamp through a small cortical  
22 17 window in the proximal tibia, and bone substitute will be used. Finally, internal fixation will be  
23 18 performed when an acceptable reduction has been achieved.

24  
25 19 If satisfactory reduction cannot be achieved using arthroscopic-assisted balloon tibioplasty,  
26 20 patients will undergo ORIF and be excluded from the study. All patients will receive rehabilitation  
27 21 therapy regardless of the group to which they are allocated, and progressive partial weight-bearing  
28 22 will be permitted with the aid of two crutches. Postoperative CT scans will be performed  
29 23 immediately, and at 2 weeks and 1, 3, 6, 12, and 24 months, and Rasmussen radiological  
30 24 evaluation will be performed [21]. To evaluate functional recovery of the knee joint and  
31 25 health-related quality of life, all patients will complete Rasmussen functional score and  
32 26 Short-Form Health Survey (SF-36) questionnaires during the follow-up period. Scoring will  
33 27 be performed by two researchers who not involved in the initial treatment.

34  
35  
36 28 Outcome measurements

37 29 Primary outcome measure:

38 30 1. Knee functional recovery will be assessed by the Rasmussen functional score, which will be  
39 31 recorded at 3, 6, 12, and 24 months postoperatively.

40 32 2. Rasmussen radiological evaluation will be recorded immediately, and at 2 weeks and 1, 3, 6,  
41 33 12, and 24 months postoperatively.

42 34 3. The quality of reduction will be determined based on postoperative CT scans, which can  
43 35 directly measure the amount of residual depression, at 2 weeks and 1, 3, 6, 12, and 24 months  
44 36 postoperatively.

45  
46  
47 37 Secondary outcome measures:

48 38 1. Intraoperative blood loss will be recorded in the anesthesia records, and will include the blood  
49 39 in suction bottles (after subtracting the lavage fluid used during the surgery), and that in the  
50 40 weighed sponges used during the operation.

51 41 2. Surgical duration.

52 42 3. The severity of lower limb pain after surgery will be assessed using a visual analog scale (VAS)  
53 43 pain score. The VAS scores of leg pain will be recorded from the day of the operation to the day of  
54 44 discharge from hospital (up to 2 weeks).



1  
2  
3 1 4. Hospitalization period after surgery.  
4 2 5. Complications including wound infection (defined as minor, major, early, or late according to  
5 3 the criteria described by the Surgical Infection Study Group [22]), reoperations, and posttraumatic  
6 4 arthritis (PTA) will be recorded.

7  
8 5 PTA may not be seen in patients within the 24-month follow-up period, and we will perform  
9 6 follow-up for at least 10 years in all patients.

10 7 6. Health-related quality of life will be measured using the Short-Form Health Survey (SF-36)  
11 8 questionnaire during follow-up.

12 9 The SF-36 is a health-related quality of life questionnaire used to assess both the mental and  
13 10 physical health of the patient.

#### 11 11 Baseline demographics

12 12 Sex, age, body mass index (BMI), mechanism of injury, smoking status, alcohol use, and  
13 13 comorbidities (i.e., hypertension, diabetes, cardiopathy)

#### 14 14 Follow-up

15 15 Follow-up will be conducted at 2 weeks and 1, 3, 6, 12, and 24 months postoperatively.

#### 16 16 Monitoring

17 17 All investigators who have completed training are capable of independently collecting the data  
18 18 and assessing the clinical outcomes, and all electronic data will be recorded by an electronic data  
19 19 capture system (DAP Software Company, Beijing, China). Safety and data monitoring will be  
20 20 performed periodically during the study. All paper and electronic data will be stored for 10 years  
21 21 in the secure research archives at the Second Affiliated Hospital of Wenzhou Medical University,  
22 22 with restricted access.

#### 23 23 Sample size calculation

24 24 There have been no previous studies on which to base the sample size calculation. In a related  
25 25 study [21], the excellent Rasmussen radiological evaluation proportion of the control group was  
26 26 60%, and the proportion of the intervention group was 70%. We carried out power analysis to  
27 27 determine the sample size required to show safety with a type I error probability of 5% and an  
28 28 80% probability of avoiding a type II error. Using these assumptions, the required sample size is  
29 29 35 per group. With the assumption of a 12.5% loss to follow-up, we will include 40 participants  
30 30 per group.

#### 31 31 Statistical analysis

32 32 The trial data will be analyzed using SPSS for Windows software (ver. 19.0; SPSS Inc., Chicago,  
33 33 IL). For continuous variables, the Shapiro–Wilk test will be applied to determine if they follow a  
34 34 normal distribution. For normally distributed variables, the means will be calculated and compared  
35 35 using the independent samples *t* test (Student's *t* test); otherwise, the Mann–Whitney U test will be  
36 36 used for group comparisons. The chi-square test will be used to analyze qualitative variables. In  
37 37 all analyses,  $P < 0.05$  will be taken to indicate statistical significance.

#### 38 38 Discussion

39 39 There have been a number of reports describing treatment for tibial plateau fractures. In a  
40 40 systematic review of the treatment of tibial plateau fractures, Metcalfe *et al.* [23] suggested that  
41 41 ORIF and external fixation are both acceptable strategies for managing bicondylar tibial plateau  
42 42 fractures, with no statistically significant differences found in the rates of complications between  
43 43 the two methods. In addition, after a systematic review of all studies reporting return to sport  
44 44 following tibial plateau fracture, Robertson *et al.* [24] reported that the rate of return to sport for

1 the total cohort was 70%, versus 60% for those with fractures managed with ORIF and 83% for  
2 fractures treated with arthroscopic-assisted reduction internal fixation (OR 3.22, 95% CI:  
3 2.09–4.97,  $P < 0.001$ ).

4 An ideal treatment method for Schatzker II–IV tibial plateau fracture not only has to achieve  
5 anatomical restoration of the knee joint, but also rigid fixation to allow early postoperative  
6 rehabilitation [25]. Traditional ORIF requires extensive soft tissue dissection, which may lead to  
7 numerous negative outcomes such as slow wound healing, infection, and PTA [26]. Due to limited  
8 exposure, intraarticular lesions, such as meniscus or anterior cruciate ligament (ACL) injuries,  
9 cannot be diagnosed and treated properly [27]. Ruffolo *et al.* [28] reported that nonunion and deep  
10 infections occur commonly after ORIF, and long surgical durations are associated with higher  
11 rates of infection. With the development of arthroscopic techniques, arthroscopy-assisted  
12 reduction and internal fixation (ARIF) has been widely adopted in the treatment of tibial plateau  
13 fractures [29], and has shown good functional recovery and radiological results [30–32]. After  
14 comparing the Rasmussen and Hospital for Special Surgery knee-rating (HSS) scores between  
15 ARIF and ORIF, Dall'oca *et al.* [12] reported that the ARIF technique improved the clinical  
16 outcome in Schatzker type II–IV fractures. Balloon tibioplasty is an arthroscopic-assisted  
17 minimally invasive technique that creates a symmetrical, contained defect to hold bone filler for  
18 subchondral support; the balloon also allows eliminate the neurological and vascular risks of the  
19 conventional approach[20]. This technique has already been used for kyphoplasty and  
20 maxillofacial surgery, and has recently been applied for tibial plateau fractures [15,19,33].  
21 Mauffrey *et al.* [20] reported early positive results with arthroscopy-assisted balloon tibioplasty  
22 used as an alternative reduction method, and the method is gaining in acceptance. This paper  
23 describes the protocol for conducting an RCT in China that will investigate the efficacy of  
24 arthroscopic-assisted balloon tibioplasty in treating Schatzker II–IV tibial plateau fractures. The  
25 design of this trial included an ORIF group as a control group, to compare the clinical outcomes of  
26 Schatzker II–IV tibial plateau fractures with those of arthroscopic-assisted balloon tibioplasty  
27 fixation. Arthroscopic-assisted balloon tibioplasty is hypothesized to be superior in reducing  
28 surgical trauma, and to have better clinical outcomes in comparison with ORIF. This study is the  
29 first RCT to compare the outcomes of Schatzker II–IV tibial plateau fractures between  
30 arthroscopic-assisted balloon tibioplasty and traditional ORIF in China. If our hypothesis is  
31 confirmed, our results will be important for informing the scheduling and development of  
32 treatment options for Schatzker II–IV tibial plateau fracture surgery. We anticipate that the results  
33 will provide reliable evidence and clarify the value of arthroscopic-assisted balloon tibioplasty as  
34 a treatment for patients with Schatzker II–IV tibial plateau fractures.

#### 35 Acknowledgements

36 The authors thank the physiotherapists for their collaboration on establishing a postoperative  
37 rehabilitation therapy for all patients involved in this study.

#### 38 Contributors

39 Ji-Qi Wang helped to design the trial and wrote the manuscript. Bing-Jie Jiang helped to design  
40 the trial. Wei-Jun Guo helped to conceive the trial and revised the manuscript. Wei-Jiang Zhang  
41 recruit the patients and conduct the trial. A-Bing Li will planned the statistical analysis. You-Ming  
42 Zhao helped to design the study and critically revised the manuscript. All authors read and  
43 approved the final manuscript.

#### 44 Funding

- 1  
2  
3 1 This work is supported by Clinical scientific research project of the Second Affiliated Hospital of  
4 2 the Wenzhou Medical University (SAHoWMU-CR2017-08-105).  
5 3 The funders had no role in the design, execution or writing of the study.  
6 4 Competing interests  
7 5 None declared.  
8 6 Patient consent  
9 7 Obtained.  
10 8 Ethics approval  
11 9 The study had been reviewed and approved by the ethics committee of the Second Affiliated  
12 10 Hospital of the Wenzhou Medical University, Wenzhou, China (batch: 2017-12).  
13 11 References  
14 12 1. McNamara IR, Smith TO, Shepherd KL, Clark AB, Nielsen DM, Donell S, Hing CB (2015) Surgical  
15 13 fixation methods for tibial plateau fractures. The Cochrane database of systematic reviews  
16 14 (9):Cd009679. doi:10.1002/14651858.CD009679.pub2  
17 15 2. Mayr R, Attal R, Zwierzina M, Blauth M, Schmoelz W (2015) Effect of additional fixation in tibial  
18 16 plateau impression fractures treated with balloon reduction and cement augmentation. *Clinical*  
19 17 *biomechanics* (Bristol, Avon) 30 (8):847-851. doi:10.1016/j.clinbiomech.2015.05.016  
20 18 3. Honkonen SE (1994) Indications for surgical treatment of tibial condyle fractures. *Clinical*  
21 19 *orthopaedics and related research* (302):199-205  
22 20 4. Maripuri SN, Rao P, Manoj-Thomas A, Mohanty K (2008) The classification systems for tibial  
23 21 plateau fractures: how reliable are they? *Injury* 39 (10):1216-1221.  
24 22 doi:10.1016/j.injury.2008.01.023  
25 23 5. Doornberg JN, Rademakers MV, van den Bekerom MP, Kerkhoffs GM, Ahn J, Steller EP, Kloen P  
26 24 (2011) Two-dimensional and three-dimensional computed tomography for the classification and  
27 25 characterisation of tibial plateau fractures. *Injury* 42 (12):1416-1425.  
28 26 doi:10.1016/j.injury.2011.03.025  
29 27 6. Chen P, Shen H, Wang W, Ni B, Fan Z, Lu H (2016) The morphological features of different  
30 28 Schatzker types of tibial plateau fractures: a three-dimensional computed tomography study.  
31 29 *Journal of orthopaedic surgery and research* 11 (1):94. doi:10.1186/s13018-016-0427-5  
32 30 7. Chen HW, Liu GD, Wu LJ (2015) Clinical and radiological outcomes following  
33 31 arthroscopic-assisted management of tibial plateau fractures: a systematic review. *Knee surgery,*  
34 32 *sports traumatology, arthroscopy : official journal of the ESSKA* 23 (12):3464-3472.  
35 33 doi:10.1007/s00167-014-3256-2  
36 34 8. Egol KA, Cantlon M, Fisher N, Broder K, Reiso A (2017) Percutaneous Repair of a Schatzker III  
37 35 Tibial Plateau Fracture Assisted by Arthroscopy. *Journal of orthopaedic trauma* 31 Suppl  
38 36 3:S12-s13. doi:10.1097/bot.0000000000000892  
39 37 9. Craiovan BS, Keshmiri A, Springorum R, Grifka J, Renkawitz T (2014) [Minimally invasive  
40 38 treatment of depression fractures of the tibial plateau using balloon repositioning and tibioplasty:  
41 39 video article]. *Der Orthopade* 43 (10):930-933. doi:10.1007/s00132-014-3019-2  
42 40 10. Gavaskar AS, Gopalan H, Tummala NC, Srinivasan P (2016) The extended posterolateral  
43 41 approach for split depression lateral tibial plateau fractures extending into the posterior column:  
44 42 2 years follow up results of a prospective study. *Injury* 47 (7):1497-1500.  
45 43 doi:10.1016/j.injury.2016.04.021  
46 44 11. Morin V, Pailhe R, Sharma A, Rouchy RC, Cognault J, Rubens-Duval B, Saragaglia D (2016)

- 1  
2  
3 1 Moore I postero-medial articular tibial fracture in alpine skiers: Surgical management and return  
4 2 to sports activity. *Injury* 47 (6):1282-1287. doi:10.1016/j.injury.2016.03.024  
5 3 12. Dall'oca C, Maluta T, Lavini F, Bondi M, Micheloni GM, Bartolozzi P (2012) Tibial plateau  
6 4 fractures: compared outcomes between ARIF and ORIF. *Strategies in trauma and limb*  
7 5 reconstruction (Online) 7 (3):163-175. doi:10.1007/s11751-012-0148-1  
8 6 13. Kampa J, Dunlay R, Sikka R, Swiontkowski M (2016) Arthroscopic-Assisted Fixation of Tibial  
9 7 Plateau Fractures: Patient-Reported Postoperative Activity Levels. *Orthopedics* 39 (3):e486-491.  
10 8 doi:10.3928/01477447-20160427-03  
11 9 14. Lasanianos NG, Garnavos C, Magnisalis E, Kourkoulis S, Babis GC (2013) A comparative  
12 10 biomechanical study for complex tibial plateau fractures: nailing and compression bolts versus  
13 11 modern and traditional plating. *Injury* 44 (10):1333-1339. doi:10.1016/j.injury.2013.03.013  
14 12 15. Pizanis A, Garcia P, Pohlemann T, Burkhardt M (2012) Balloon tibioplasty: a useful tool for  
15 13 reduction of tibial plateau depression fractures. *Journal of orthopaedic trauma* 26 (7):e88-93.  
16 14 doi:10.1097/BOT.0b013e31823a8dc8  
17 15 16. Ziogas K, Tourvas E, Galanakis I, Kouvidis G (2015) Arthroscopy Assisted Balloon Osteoplasty  
18 16 of a Tibia Plateau Depression Fracture: A Case Report. *North American journal of medical*  
19 17 sciences 7 (9):411-414. doi:10.4103/1947-2714.166223  
20 18 17. Jentzsch T, Fritz Y, Veit-Haibach P, Schmitt J, Sprengel K, Werner CM (2015) Osseous vitality in  
21 19 single photon emission computed tomography/computed tomography (SPECT/CT) after balloon  
22 20 tibioplasty of the tibial plateau: a case series. *BMC medical imaging* 15:56.  
23 21 doi:10.1186/s12880-015-0091-y  
24 22 18. Di Caprio F, Buda R, Ghermandi R, Ferruzzi A, Timoncini A, Parma A, Giannini S (2010)  
25 23 Combined arthroscopic treatment of tibial plateau and intercondylar eminence avulsion fractures.  
26 24 *The Journal of bone and joint surgery American volume* 92 Suppl 2:161-169.  
27 25 doi:10.2106/jbjs.j.00812  
28 26 19. Ollivier M, Turati M, Munier M, Lunebourg A, Argenson JN, Parratte S (2016) Balloon  
29 27 tibioplasty for reduction of depressed tibial plateau fractures: Preliminary radiographic and  
30 28 clinical results. *International orthopaedics* 40 (9):1961-1966. doi:10.1007/s00264-015-3047-5  
31 29 20. Mauffrey C, Roberts G, Cuellar DO, Herbert B, Hak D (2014) Balloon tibioplasty: pearls and  
32 30 pitfalls. *The journal of knee surgery* 27 (1):31-37. doi:10.1055/s-0033-1363516  
33 31 21. Elabjer E, Bencic I, Cuti T, Cerovecki T, Curic S, Vidovic D (2017) Tibial plateau fracture  
34 32 management: arthroscopically-assisted versus ORIF procedure - clinical and radiological  
35 33 comparison. *Injury* 48 Suppl 5:S61-s64. doi:10.1016/s0020-1383(17)30742-8  
36 34 22. Peel AL, Taylor EW (1991) Proposed definitions for the audit of postoperative infection: a  
37 35 discussion paper. Surgical Infection Study Group. *Annals of the Royal College of Surgeons of*  
38 36 *England* 73 (6):385-388  
39 37 23. Metcalfe D, Hickson CJ, McKee L, Griffin XL (2015) External versus internal fixation for  
40 38 bicondylar tibial plateau fractures: systematic review and meta-analysis. *Journal of orthopaedics*  
41 39 and traumatology : official journal of the Italian Society of Orthopaedics and Traumatology 16  
42 40 (4):275-285. doi:10.1007/s10195-015-0372-9  
43 41 24. Robertson GAJ, Wong SJ, Wood AM (2017) Return to sport following tibial plateau fractures: A  
44 42 systematic review. *World journal of orthopedics* 8 (7):574-587. doi:10.5312/wjo.v8.i7.574  
45 43 25. Rossi R, Bonasia DE, Blonna D, Assom M, Castoldi F (2008) Prospective follow-up of a simple  
46 44 arthroscopic-assisted technique for lateral tibial plateau fractures: results at 5 years. *The Knee* 15

- 1 (5):378-383. doi:10.1016/j.knee.2008.04.001
- 2 26. Rademakers MV, Kerkhoffs GM, Sierevelt IN, Raaymakers EL, Marti RK (2007) Operative  
3 treatment of 109 tibial plateau fractures: five- to 27-year follow-up results. *Journal of orthopaedic*  
4 *trauma* 21 (1):5-10. doi:10.1097/BOT.0b013e31802c5b51
- 5 27. Chen XZ, Liu CG, Chen Y, Wang LQ, Zhu QZ, Lin P (2015) Arthroscopy-assisted surgery for tibial  
6 plateau fractures. *Arthroscopy : the journal of arthroscopic & related surgery : official publication*  
7 *of the Arthroscopy Association of North America and the International Arthroscopy Association*  
8 31 (1):143-153. doi:10.1016/j.arthro.2014.06.005
- 9 28. Ruffolo MR, Gettys FK, Montijo HE, Seymour RB, Karunakar MA (2015) Complications of  
10 high-energy bicondylar tibial plateau fractures treated with dual plating through 2 incisions.  
11 *Journal of orthopaedic trauma* 29 (2):85-90. doi:10.1097/bot.000000000000203
- 12 29. Chan YS, Yuan LJ, Hung SS, Wang CJ, Yu SW, Chen CY, Chao EK, Lee MS (2003)  
13 Arthroscopic-assisted reduction with bilateral buttress plate fixation of complex tibial plateau  
14 fractures. *Arthroscopy : the journal of arthroscopic & related surgery : official publication of the*  
15 *Arthroscopy Association of North America and the International Arthroscopy Association* 19  
16 (9):974-984
- 17 30. Chiu CH, Cheng CY, Tsai MC, Chang SS, Chen AC, Chen YJ, Chan YS (2013) Arthroscopy-assisted  
18 reduction of posteromedial tibial plateau fractures with buttress plate and cannulated screw  
19 construct. *Arthroscopy : the journal of arthroscopic & related surgery : official publication of the*  
20 *Arthroscopy Association of North America and the International Arthroscopy Association* 29  
21 (8):1346-1354. doi:10.1016/j.arthro.2013.05.003
- 22 31. Ruiz-Iban MA, Diaz-Heredia J, Elias-Martin E, Moros-Marco S, Cebreiro Martinez Del Val I  
23 (2012) Repair of meniscal tears associated with tibial plateau fractures: a review of 15 cases. *The*  
24 *American journal of sports medicine* 40 (10):2289-2295. doi:10.1177/0363546512457552
- 25 32. Gill TJ, Moezzi DM, Oates KM, Sterett WI (2001) Arthroscopic reduction and internal fixation  
26 of tibial plateau fractures in skiing. *Clinical orthopaedics and related research* (383):243-249
- 27 33. Doria C, Balsano M, Spiga M, Mosele GR, Puddu L, Caggiari G (2017) Tibioplasty, a new  
28 technique in the management of tibial plateau fracture: A multicentric experience review. *Journal*  
29 *of orthopaedics* 14 (1):176-181. doi:10.1016/j.jor.2016.12.002
- 30
- 31 Figure 1. Flow chart showing the steps in participant recruitment, treatment and analysis. balloon  
32 tibioplasty, arthroscopic assisted balloon tibioplasty group; ORIF, open reduction and internal  
33 fixation group.



Flow chart showing the steps in participant recruitment, treatment and analysis. balloon tibioplasty, arthroscopic assisted balloon tibioplasty group; ORIF, open reduction and internal fixation group.

189x170mm (300 x 300 DPI)

## supplementary information

title: Arthroscopic-assisted balloon tibioplasty versus open reduction internal fixation (ORIF) for treatment of Schatzker II–IV tibial plateau fractures: Study protocol of a randomized controlled trial

Ji-Qi Wang<sup>1</sup>, Bing-Jie Jiang<sup>1</sup>, Wei-Jun Guo<sup>1</sup>, Wei-Jiang Zhang<sup>1</sup>, A-Bing Li<sup>1</sup>, You-Ming Zhao<sup>1</sup>

Institutional affiliations:

<sup>1</sup>Department of Orthopaedics, The Second Affiliated Hospital of Wenzhou Medical University, 109#

Xue Yuan Xi Road, Wenzhou, Zhejiang, China, 325000.

**Corresponding author:** You-Ming Zhao, E-mail: [wmuorthopaedic@sina.com](mailto:wmuorthopaedic@sina.com)

supplementary information, S1

CT scan of Schatzker II to IV tibial plateau fractures, which conform to our inclusion criteria.

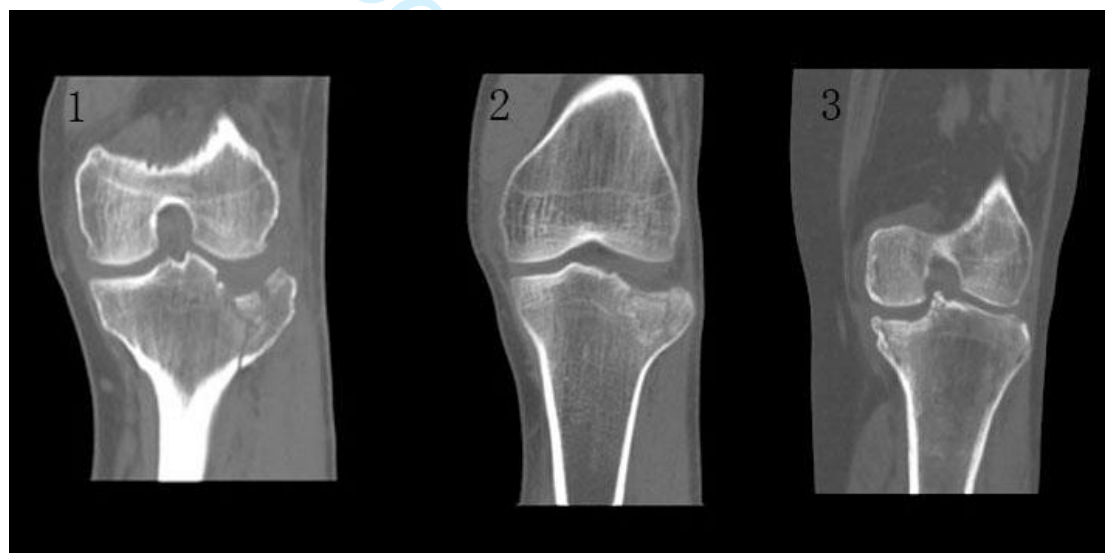

1, CT scan of Schatzker II tibial plateau fracture, which include the lateral platform split and depression (left limb); 2, CT scan of Schatzker III tibial plateau fracture, which only include the lateral tibial plateau depression (left limb); 3, CT scan of Schatzker IV tibial plateau fracture, which only include the medial tibial plateau depression (left limb).



supplementary information, S2

Simulated the operation process of Schatzker III tibial plateau fracture with Mimics software

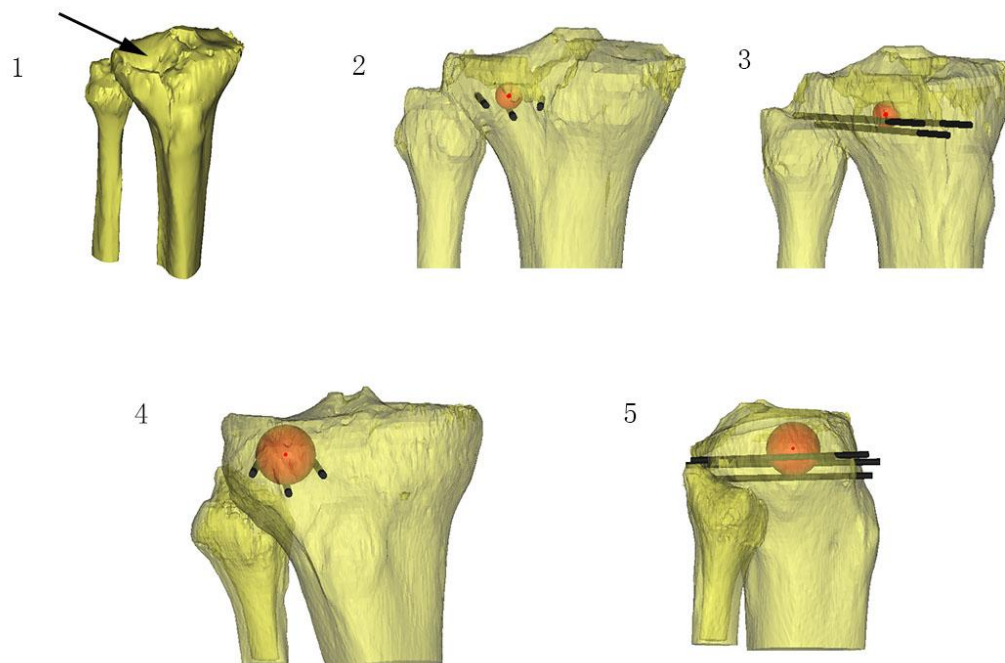

1, The black arrowhead in the figure points to the depression of the lateral tibial plateau; 2, Three Kirschner wires and the balloon are placed below the depressed fragment under fluoroscopy (anteroposterior); 3, Three Kirschner wires and balloon are placed below the depressed fragment under fluoroscopy (laterolateral); 4, The balloon slowly inflated with contrast solution, and the depression of the lateral tibial plateau will be anatomical reduction (anteroposterior); 5, The balloon slowly inflated with contrast solution, and the depression of the lateral tibial plateau will be anatomical reduction (laterolateral). After removal of the balloon, calcium phosphate cement will be injected into the cavity produced by the balloon under fluoroscopic guidance, ensuring there is no excessive cement overflow into the tibial medullary cavity.

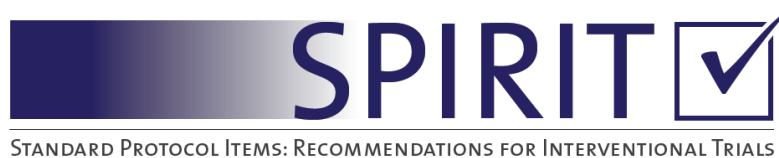

SPIRIT 2013 Checklist: Recommended items to address in a clinical trial protocol and related documents\*

| Section/item                      | Item No | Description                                                                                                                                                                                                                                                                              |
|-----------------------------------|---------|------------------------------------------------------------------------------------------------------------------------------------------------------------------------------------------------------------------------------------------------------------------------------------------|
| <b>Administrative information</b> |         |                                                                                                                                                                                                                                                                                          |
| Title (P1)                        | 1       | Descriptive title identifying the study design, population, interventions, and, if applicable, trial acronym                                                                                                                                                                             |
| Trial registration (P1)           | 2a      | Trial identifier and registry name. If not yet registered, name of intended registry                                                                                                                                                                                                     |
|                                   | 2b      | All items from the World Health Organization Trial Registration Data Set                                                                                                                                                                                                                 |
| Protocol version (Not mentioned)  | 3       | Date and version identifier                                                                                                                                                                                                                                                              |
| Funding (P7)                      | 4       | Sources and types of financial, material, and other support                                                                                                                                                                                                                              |
| Roles and responsibilities (P6)   | 5a      | Names, affiliations, and roles of protocol contributors                                                                                                                                                                                                                                  |
|                                   | 5b      | Name and contact information for the trial sponsor                                                                                                                                                                                                                                       |
|                                   | 5c      | Role of study sponsor and funders, if any, in study design; collection, management, analysis, and interpretation of data; writing of the report; and the decision to submit the report for publication, including whether they will have ultimate authority over any of these activities |
|                                   | 5d      | Composition, roles, and responsibilities of the coordinating centre, steering committee, endpoint adjudication committee, data management team, and other individuals or groups overseeing the trial, if applicable (see Item 21a for data monitoring committee)                         |
| <b>Introduction</b>               |         |                                                                                                                                                                                                                                                                                          |
| Background and rationale (P2)     | 6a      | Description of research question and justification for undertaking the trial, including summary of relevant studies (published and unpublished) examining benefits and harms for each intervention                                                                                       |
|                                   | 6b      | Explanation for choice of comparators                                                                                                                                                                                                                                                    |
| Objectives (P6)                   | 7       | Specific objectives or hypotheses                                                                                                                                                                                                                                                        |

1  
2  
3  
4  
5  
6  
7  
8  
9  
10  
11  
12  
13  
14  
15  
16  
17  
18  
19  
20  
21  
22  
23  
24  
25  
26  
27  
28  
29  
30  
31  
32  
33  
34  
35  
36  
37  
38  
39  
40  
41  
42  
43  
44  
45  
46  
47  
48  
49  
50  
51  
52  
53  
54  
55  
56  
57  
58  
59  
60

Trial design (P2) 8 Description of trial design including type of trial (eg, parallel group, crossover, factorial, single group), allocation ratio, and framework (eg, superiority, equivalence, noninferiority, exploratory)

### Methods: Participants, interventions, and outcomes

Study setting (P2) 9 Description of study settings (eg, community clinic, academic hospital) and list of countries where data will be collected. Reference to where list of study sites can be obtained

Eligibility criteria (P3) 10 Inclusion and exclusion criteria for participants. If applicable, eligibility criteria for study centres and individuals who will perform the interventions (eg, surgeons, psychotherapists)

Interventions (P3-P4) 11a Interventions for each group with sufficient detail to allow replication, including how and when they will be administered

11b Criteria for discontinuing or modifying allocated interventions for a given trial participant (eg, drug dose change in response to harms, participant request, or improving/worsening disease)

11c Strategies to improve adherence to intervention protocols, and any procedures for monitoring adherence (eg, drug tablet return, laboratory tests)

11d Relevant concomitant care and interventions that are permitted or prohibited during the trial

Outcomes (P4-P5) 12 Primary, secondary, and other outcomes, including the specific measurement variable (eg, systolic blood pressure), analysis metric (eg, change from baseline, final value, time to event), method of aggregation (eg, median, proportion), and time point for each outcome. Explanation of the clinical relevance of chosen efficacy and harm outcomes is strongly recommended

Participant timeline (P3) 13 Time schedule of enrolment, interventions (including any run-ins and washouts), assessments, and visits for participants. A schematic diagram is highly recommended (see Figure)

Sample size (P5) 14 Estimated number of participants needed to achieve study objectives and how it was determined, including clinical and statistical assumptions supporting any sample size calculations

Recruitment (P5) 15 Strategies for achieving adequate participant enrolment to reach target sample size

### Methods: Assignment of interventions (for controlled trials)

Allocation:

|    |                 |     |                                                                         |
|----|-----------------|-----|-------------------------------------------------------------------------|
| 1  |                 |     |                                                                         |
| 2  | Sequence        | 16a | Method of generating the allocation sequence (eg, computer-             |
| 3  | generation (P3) |     | generated random numbers), and list of any factors for stratification.  |
| 4  |                 |     | To reduce predictability of a random sequence, details of any planned   |
| 5  |                 |     | restriction (eg, blocking) should be provided in a separate document    |
| 6  |                 |     | that is unavailable to those who enrol participants or assign           |
| 7  |                 |     | interventions                                                           |
| 8  |                 |     |                                                                         |
| 9  | Allocation      | 16b | Mechanism of implementing the allocation sequence (eg, central          |
| 10 | concealment     |     | telephone; sequentially numbered, opaque, sealed envelopes),            |
| 11 | mechanism       |     | describing any steps to conceal the sequence until interventions are    |
| 12 | (P3)            |     | assigned                                                                |
| 13 |                 |     |                                                                         |
| 14 | Implementation  | 16c | Who will generate the allocation sequence, who will enrol participants, |
| 15 | (P3)            |     | and who will assign participants to interventions                       |
| 16 |                 |     |                                                                         |
| 17 | Blinding        | 17a | Who will be blinded after assignment to interventions (eg, trial        |
| 18 | (masking) (P3)  |     | participants, care providers, outcome assessors, data analysts), and    |
| 19 |                 |     | how                                                                     |
| 20 |                 |     |                                                                         |
| 21 |                 | 17b | If blinded, circumstances under which unblinding is permissible, and    |
| 22 |                 |     | procedure for revealing a participant's allocated intervention during   |
| 23 |                 |     | the trial                                                               |
| 24 |                 |     |                                                                         |
| 25 |                 |     |                                                                         |

### Methods: Data collection, management, and analysis

|    |                 |     |                                                                          |
|----|-----------------|-----|--------------------------------------------------------------------------|
| 26 |                 |     |                                                                          |
| 27 |                 |     |                                                                          |
| 28 | Data collection | 18a | Plans for assessment and collection of outcome, baseline, and other      |
| 29 | methods (P4)    |     | trial data, including any related processes to promote data quality (eg, |
| 30 |                 |     | duplicate measurements, training of assessors) and a description of      |
| 31 |                 |     | study instruments (eg, questionnaires, laboratory tests) along with      |
| 32 |                 |     | their reliability and validity, if known. Reference to where data        |
| 33 |                 |     | collection forms can be found, if not in the protocol                    |
| 34 |                 |     |                                                                          |
| 35 |                 | 18b | Plans to promote participant retention and complete follow-up,           |
| 36 |                 |     | including list of any outcome data to be collected for participants who  |
| 37 |                 |     | discontinue or deviate from intervention protocols                       |
| 38 |                 |     |                                                                          |
| 39 | Data            | 19  | Plans for data entry, coding, security, and storage, including any       |
| 40 | management (P5) |     | related processes to promote data quality (eg, double data entry;        |
| 41 |                 |     | range checks for data values). Reference to where details of data        |
| 42 |                 |     | management procedures can be found, if not in the protocol               |
| 43 |                 |     |                                                                          |
| 44 |                 |     |                                                                          |
| 45 | Statistical     | 20a | Statistical methods for analysing primary and secondary outcomes.        |
| 46 | methods (P5)    |     | Reference to where other details of the statistical analysis plan can be |
| 47 |                 |     | found, if not in the protocol                                            |
| 48 |                 |     |                                                                          |
| 49 |                 | 20b | Methods for any additional analyses (eg, subgroup and adjusted           |
| 50 |                 |     | analyses)                                                                |
| 51 |                 |     |                                                                          |
| 52 |                 | 20c | Definition of analysis population relating to protocol non-adherence     |
| 53 |                 |     | (eg, as randomised analysis), and any statistical methods to handle      |
| 54 |                 |     | missing data (eg, multiple imputation)                                   |
| 55 |                 |     |                                                                          |
| 56 |                 |     |                                                                          |
| 57 |                 |     |                                                                          |
| 58 |                 |     |                                                                          |
| 59 |                 |     |                                                                          |
| 60 |                 |     |                                                                          |

**Methods: Monitoring**

|                         |     |                                                                                                                                                                                                                                                                                                                                       |
|-------------------------|-----|---------------------------------------------------------------------------------------------------------------------------------------------------------------------------------------------------------------------------------------------------------------------------------------------------------------------------------------|
| Data monitoring<br>(P5) | 21a | Composition of data monitoring committee (DMC); summary of its role and reporting structure; statement of whether it is independent from the sponsor and competing interests; and reference to where further details about its charter can be found, if not in the protocol. Alternatively, an explanation of why a DMC is not needed |
|                         | 21b | Description of any interim analyses and stopping guidelines, including who will have access to these interim results and make the final decision to terminate the trial                                                                                                                                                               |
| Harms (P5)              | 22  | Plans for collecting, assessing, reporting, and managing solicited and spontaneously reported adverse events and other unintended effects of trial interventions or trial conduct                                                                                                                                                     |
| Auditing (P5)           | 23  | Frequency and procedures for auditing trial conduct, if any, and whether the process will be independent from investigators and the sponsor                                                                                                                                                                                           |

**Ethics and dissemination**

|                                               |     |                                                                                                                                                                                                                                  |
|-----------------------------------------------|-----|----------------------------------------------------------------------------------------------------------------------------------------------------------------------------------------------------------------------------------|
| Research ethics approval (P6)                 | 24  | Plans for seeking research ethics committee/institutional review board (REC/IRB) approval                                                                                                                                        |
| Protocol amendments (Not mentioned)           | 25  | Plans for communicating important protocol modifications (eg, changes to eligibility criteria, outcomes, analyses) to relevant parties (eg, investigators, REC/IRBs, trial participants, trial registries, journals, regulators) |
| Consent or assent (P7)                        | 26a | Who will obtain informed consent or assent from potential trial participants or authorised surrogates, and how (see Item 32)                                                                                                     |
|                                               | 26b | Additional consent provisions for collection and use of participant data and biological specimens in ancillary studies, if applicable                                                                                            |
| Confidentiality (P5)                          | 27  | How personal information about potential and enrolled participants will be collected, shared, and maintained in order to protect confidentiality before, during, and after the trial                                             |
| Declaration of interests (P7)                 | 28  | Financial and other competing interests for principal investigators for the overall trial and each study site                                                                                                                    |
| Access to data (P5)                           | 29  | Statement of who will have access to the final trial dataset, and disclosure of contractual agreements that limit such access for investigators                                                                                  |
| Ancillary and post-trial care (Not mentioned) | 30  | Provisions, if any, for ancillary and post-trial care, and for compensation to those who suffer harm from trial participation                                                                                                    |

|                                                             |                              |     |                                                                                                                                                                                                                                                                                     |
|-------------------------------------------------------------|------------------------------|-----|-------------------------------------------------------------------------------------------------------------------------------------------------------------------------------------------------------------------------------------------------------------------------------------|
| 1<br>2<br>3<br>4<br>5<br>6<br>7<br>8<br>9<br>10<br>11<br>12 | Dissemination<br>policy (P5) | 31a | Plans for investigators and sponsor to communicate trial results to participants, healthcare professionals, the public, and other relevant groups (eg, via publication, reporting in results databases, or other data sharing arrangements), including any publication restrictions |
| 13<br>14<br>15<br>16<br>17<br>18                            |                              | 31b | Authorship eligibility guidelines and any intended use of professional writers                                                                                                                                                                                                      |
| 19<br>20<br>21<br>22                                        |                              | 31c | Plans, if any, for granting public access to the full protocol, participant-level dataset, and statistical code                                                                                                                                                                     |

### Appendices

|                                                                                                                                                                                                                                  |                                                  |    |                                                                                                                                                                                                |
|----------------------------------------------------------------------------------------------------------------------------------------------------------------------------------------------------------------------------------|--------------------------------------------------|----|------------------------------------------------------------------------------------------------------------------------------------------------------------------------------------------------|
| 23<br>24<br>25<br>26<br>27<br>28<br>29<br>30<br>31<br>32<br>33<br>34<br>35<br>36<br>37<br>38<br>39<br>40<br>41<br>42<br>43<br>44<br>45<br>46<br>47<br>48<br>49<br>50<br>51<br>52<br>53<br>54<br>55<br>56<br>57<br>58<br>59<br>60 | Informed consent<br>materials (Not<br>mentioned) | 32 | Model consent form and other related documentation given to participants and authorised surrogates                                                                                             |
|                                                                                                                                                                                                                                  | Biological<br>specimens (Not<br>applicable)      | 33 | Plans for collection, laboratory evaluation, and storage of biological specimens for genetic or molecular analysis in the current trial and for future use in ancillary studies, if applicable |

---

\*It is strongly recommended that this checklist be read in conjunction with the SPIRIT 2013 Explanation & Elaboration for important clarification on the items. Amendments to the protocol should be tracked and dated. The SPIRIT checklist is copyrighted by the SPIRIT Group under the Creative Commons "[Attribution-NonCommercial-NoDerivs 3.0 Unported](https://creativecommons.org/licenses/by-nc-nd/3.0/)" license.

# BMJ Open

## Arthroscopic-assisted balloon tibioplasty versus open reduction internal fixation (ORIF) for treatment of Schatzker II–IV tibial plateau fractures: Study protocol of a randomized controlled trial

|                                 |                                                                                                                                                                                                                                                                                                                                                                                                                                                      |
|---------------------------------|------------------------------------------------------------------------------------------------------------------------------------------------------------------------------------------------------------------------------------------------------------------------------------------------------------------------------------------------------------------------------------------------------------------------------------------------------|
| Journal:                        | <i>BMJ Open</i>                                                                                                                                                                                                                                                                                                                                                                                                                                      |
| Manuscript ID                   | bmjopen-2018-021667.R2                                                                                                                                                                                                                                                                                                                                                                                                                               |
| Article Type:                   | Protocol                                                                                                                                                                                                                                                                                                                                                                                                                                             |
| Date Submitted by the Author:   | 12-Jun-2018                                                                                                                                                                                                                                                                                                                                                                                                                                          |
| Complete List of Authors:       | Wang, Ji-Qi; Department of Orthopaedics<br>Jiang, Bing-Jie; The Second Affiliated Hospital of Wenzhou Medical University<br>Guo, Wei-Jun; The Second Affiliated Hospital of Wenzhou Medical University<br>Zhang, Wei-Jiang; The Second Affiliated Hospital of Wenzhou Medical University<br>Li, A-Bing; The Second Affiliated Hospital of Wenzhou Medical University<br>Zhao, You-Ming; The Second Affiliated Hospital of Wenzhou Medical University |
| <b>Primary Subject Heading</b>: | Surgery                                                                                                                                                                                                                                                                                                                                                                                                                                              |
| Secondary Subject Heading:      | Sports and exercise medicine, Surgery                                                                                                                                                                                                                                                                                                                                                                                                                |
| Keywords:                       | ORTHOPAEDIC & TRAUMA SURGERY, Knee < ORTHOPAEDIC & TRAUMA SURGERY, Adult orthopaedics < ORTHOPAEDIC & TRAUMA SURGERY                                                                                                                                                                                                                                                                                                                                 |
|                                 |                                                                                                                                                                                                                                                                                                                                                                                                                                                      |

SCHOLARONE™  
Manuscripts



1  
2  
3 **1 Arthroscopic-assisted balloon tibioplasty versus open reduction internal fixation (ORIF) for**  
4 **2 treatment of Schatzker II–IV tibial plateau fractures: Study protocol of a randomized**  
5 **3 controlled trial**  
6  
7 4

8 5 Ji-Qi Wang<sup>1</sup>, Bing-Jie Jiang<sup>1</sup>, Wei-Jun Guo<sup>1</sup>, Wei-Jiang Zhang<sup>1</sup>, A-Bing Li<sup>1</sup>, You-Ming Zhao<sup>1</sup>  
9

10 6 Institutional affiliations:

11 7 <sup>1</sup>Department of Orthopaedics, The Second Affiliated Hospital of Wenzhou Medical University,  
12 8 109# Xue Yuan Xi Road, Wenzhou, Zhejiang, China, 325000.

13 9 **Corresponding author:** You-Ming Zhao, E-mail: [wmuorthopaedic@sina.com](mailto:wmuorthopaedic@sina.com)

14 10 Address: 109# Xue Yuan Xi Road, Wenzhou, Zhejiang, China, 325000  
15 11

16 12 **Keywords:** Tibial plateau fracture; Arthroscopic-assisted surgery; Balloon tibioplasty; Open  
17 13 Reduction Internal Fixation; Protocol  
18 14

19 15 **Word count:** 2467  
20 16

21 17 **Abstract**

22 18 **Introduction:** Arthroscopic-assisted balloon tibioplasty is an emerging technology that has shown  
23 19 advantages in recovering depression of the articular surface. However, studies evaluating clinical  
24 20 outcomes between arthroscopic-assisted balloon tibioplasty and traditional open reduction internal  
25 21 fixation (ORIF) are sparse. This is the first randomized study to compare arthroscopic-assisted  
26 22 balloon tibioplasty with ORIF, and will provide guidance for treating patients with Schatzker type  
27 23 II, III and IV with depression of the medial tibial plateau only.

28 24 **Methods and analysis:** A blinded randomized controlled trial will be conducted and a total of 80  
29 25 participants will be randomly divided into either the arthroscopic-assisted balloon tibioplasty  
30 26 group or the ORIF group, at a ratio of 1:1. The primary clinical outcome measures are the knee  
31 27 functional scores, Rasmunssen radiological evaluation scores, and the quality of reduction based  
32 28 on postoperative computed tomography scan. Secondary clinical outcome measures are  
33 29 intraoperative blood loss, surgical duration, visual analog scale score after surgery, hospital  
34 30 duration after surgery, complications, and SF-36 score.

35 31 **Ethics and dissemination:** This study has been reviewed and approved by the Institutional  
36 32 Review Board of the Second Affiliated Hospital of Wenzhou Medical University (batch: 2017-12).  
37 33 The results will be presented in peer-reviewed journals after completion of the study.

38 34 **Trial registration number:** NCT03327337, Pre-results

39 35 **Article summary:**

40 36 **Strengths and limitations of this study:**

41 37 **This trial is designed to have a feasible, comparative effectiveness trial design that has**  
42 38 **similarities to common clinical situations.**

43 39 **This study is the first RCT to compare the outcomes of Schatzker II–IV tibial plateau fractures**  
44 40 **between arthroscopic-assisted balloon tibioplasty and traditional ORIF in China.**

1  
2  
3 1 **Our results may be limited by heterogeneity due to differences in age, gender, region and race.**

4 2 **The size of the study sample limits the power of the observations.**

5 3 **Risk of bias due to death, loss of follow -up or uncompliant patients unable to complete tests or**  
6 4 **questionnaires.**

7  
8  
9 6 **Introduction**

10 7 Tibial plateau fractures are complex intraarticular and metaphyseal lesions, accounting for 1–2%  
11 8 of all fractures [1] caused by either a valgus or varus force in combination with an axial force [2].  
12 9 The acknowledged surgical indication for a tibial plateau fracture is tilt or valgus malalignment  
13 10 exceeding 5°, articular step-off exceeding 3 mm, or condylar widening exceeding 5 mm (lateral  
14 11 tibial plateau fracture), or tilt or any displacement (medial tibial plateau fracture) [3]. Many  
15 12 classification systems have been developed for tibial plateau fractures and are used for  
16 13 preoperative planning and prognostic purposes [4-6]. The Schatzker classification system is  
17 14 simple and widely used among orthopedic surgeons in clinical practice. Schatzker II–IV tibial  
18 15 plateau fractures include lateral or medial depressed articular fragments, and loss of joint  
19 16 congruity in these injuries is associated with a poor prognosis, such as posttraumatic arthrosis and  
20 17 valgus deformity despite proper management. Therefore, restoration of the joint surface is the goal  
21 18 of surgery [7-9].

22 19 Open reduction internal fixation (ORIF) for treatment of this type of fracture has yielded  
23 20 promising results. Gavaskar *et al.* [10] reported that ORIF could achieve satisfactory radiological  
24 21 and functional results in split depression lateral tibial plateau fractures. After ORIF for 15 cases of  
25 22 medial tibial plateau fractures, Morin *et al.* [11] reported that 93% of patients were satisfied or  
26 23 very satisfied with their functional recovery and there were no cases of pseudarthrosis or  
27 24 secondary varus displacement. However, traditional ORIF treatment has a number of  
28 25 disadvantages, e.g., excessive damage, limited exposure of the articular cavity, and insufficient  
29 26 ability to diagnose and address internal joint injury [12].

30 27 With recent technological advances, the treatment concept of tibial plateau fractures has  
31 28 progressed from mechanical fixation to minimally invasive surgical interventions for  
32 29 biomechanical stability [13,14]. Based on the success of vertebral kyphoplasty, arthroscopic  
33 30 assisted balloon tibioplasty [15] has been developed as a novel minimally invasive technique for  
34 31 reducing depressed tibial plateau fractures. Arthroscopic-assisted balloon tibioplasty is an  
35 32 emerging technology that aims to visualize the articular surface, and uses balloon distension tibial  
36 33 plasty assisted by arthroscopy to recover depression of the articular surface and fix the fracture  
37 34 according to its specific type [16]. This technology has shown advantages in recovering  
38 35 depression of the articular surface [17], treating additional intraarticular lesions during the  
39 36 operation, and minimizing surgical trauma. Furthermore, under fluoroscopy, optimal centering of  
40 37 the expanding tibioplasty balloon allows a widespread and continuously increasing reduction force  
41 38 to be applied to the fracture area [18]. Primary data from Ollivier *et al.* [19] showed that depressed  
42 39 tibial plateau fractures treated with arthroscopic-assisted balloon tibioplasty had a high rate of  
43 40 anatomic reduction and good clinical outcomes. Similar results were also reported by Pizanis *et al.*  
44 41 [15] using arthroscopic-assisted balloon tibioplasty without classic fenestration of the tibia, which  
45 42 would minimize surgical trauma. However, a number of factors influence the clinical adoption of  
46 43 this surgical technique: the application time of is short, there is a paucity of case data and  
47 44 information regarding long-term follow-up, and the cost of operation is higher than traditional

1  
2  
3 1 ORIF [20].

4 2 To our knowledge, there have been no randomized controlled trials (RCTs) of the clinical  
5 3 outcomes of arthroscopic-assisted balloon tibioplasty versus ORIF, where high-quality RCTs are  
6 4 generally deemed to be the gold standard in clinical research. In this study, we will perform an  
7 5 RCT to compare arthroscopic-assisted balloon tibioplasty and traditional ORIF.

#### 6 **Methods and design**

7 This study has been approved by the Ethics Committee of the Second Affiliated Hospital of  
8 Wenzhou Medical University, and conforms to the Declaration of Helsinki. All patients will  
9 provide informed consent prior to participation in this study. This trial has been registered at the  
10 US National Institutes of Health Clinical Trials Registry (NCT03327337). The protocol conforms  
11 to the Standard Protocol Items Recommendations for Interventional Trials. Figure 1 shows a chart  
12 of the trial design.

#### 13 **Participants**

14 This study is a parallel group RCT conducted at the Department of Orthopaedics, the Second  
15 Affiliated Hospital of Wenzhou Medical University. Fractures will be evaluated on anteroposterior  
16 (AP) and laterolateral (LL) radiographs and by computed tomography (CT), which can analyze the  
17 fracture pattern more precisely.

#### 18 **Inclusion criteria**

19 (1) Acute closed fractures less than 10 days old, and X-ray and CT scan showing Schatzker type II,  
20 III or IV with depression of the medial tibial plateau only. (supplementary information, S1)

21 (2) No history of knee joint dislocation or other knee trauma.

22 (3) Signed informed consent.

23 (4) Age of 18–80 years.

#### 24 **Exclusion criteria**

25 (1) Other types of tibial plateau fracture (Schatzker type I, IV with split or comminute fracture, V,  
26 and VI).

27 (2) Concomitant injuries that will interfere with functional recovery, such as combined fracture of  
28 the lower limb.

29 (3) Open fractures, pathological fractures, immunodeficiency, hematological diseases, or severe  
30 hepatorenal disorders.

#### 31 **Patient involvement**

32 The design of this study was not directly involved in the patients, and the intervention in this study  
33 is not considered to change the patient's direct perception of the preoperative and intraoperative  
34 processes or the postoperative rehabilitation therapy. As the enrolment in study may influence the  
35 patient's view of the clinical work or even feel like a burden, the patients will be interviewed  
36 randomly to identify adverse effects. The results will be informed by mail to all the patients  
37 involved.

#### 38 **Randomization and blinding**

39 Pre-randomization eligibility checks will be carried out to ensure that participants are eligible for  
40 inclusion in the study. Patients will be randomly assigned to one of two groups (experimental or  
41 control) using a computer-generated random assignment in a 1:1 ratio, and allocation will be  
42 concealed until the point of randomization. Patients, researchers performing the follow-up  
43 measurements, and the trial statistician will be blinded to the group allocations until the last  
44 questionnaires have been completed.

## 1 **Interventions**

### 2 Arthroscopic-assisted balloon tibioplasty group:

3 Step 1: In cases with a splitting tibial plateau fracture (Schatzker type II), an incision will be made  
4 in the proximal tibia according to the fracture type, for placement of a small locking T-plate  
5 (Synthes, Freiburg, Germany) using minimally invasive techniques. Then, a temporary cortical  
6 bone screw will be inserted to prevent cortical rupture when the balloon is enlarged. Temporary  
7 fixation of the cortical bone screw will permit further adjustment of the position of the plate. In  
8 cases with no splitting tibial plateau fracture (Schatzker type III or IV with depression of the  
9 medial tibial plateau only), we will proceed to step 2 directly.

10 Step 2: Three Kirschner wires (2 mm) will be placed below the depressed fragment under  
11 fluoroscopy. Using live fluoroscopy, the balloon will be placed in the optimal position and slowly  
12 inflated with contrast solution (Ultravist®; Schering, Berlin, Germany). The arthroscope will then  
13 be used to confirm anatomical reduction of the depressed fragment. The balloon will be deflated,  
14 repositioned, and reinflated to reduce the persistent depression. After removal of the balloon, we  
15 will use a Kirschner wire (2 mm) to temporarily lift the depressed fragment and carefully inject  
16 calcium phosphate cement (Osteopal® V; Heraeus Medical GmbH, Wehrheim, Germany) into the  
17 cavity produced by the balloon under fluoroscopic guidance, ensuring there is no excessive  
18 cement overflow into the tibial medullary cavity. (supplementary information, S2)

### 19 ORIF group:

20 For this technique, a lateral or medial surgical approach will be used according to the type of  
21 fracture. The depressed fragment will be elevated by a metal tamp through a small cortical  
22 window in the proximal tibia, and bone substitute will be used. Finally, internal fixation will be  
23 performed when an acceptable reduction has been achieved.

24 If satisfactory reduction cannot be achieved using arthroscopic-assisted balloon tibioplasty,  
25 patients will undergo ORIF and be excluded from the study. All patients will receive rehabilitation  
26 therapy regardless of the group to which they are allocated, and progressive partial weight-bearing  
27 will be permitted with the aid of two crutches. Postoperative CT scans will be performed  
28 immediately, and at 2 weeks and 1, 3, 6, 12, and 24 months, and Rasmussen radiological  
29 evaluation will be performed [21]. To evaluate functional recovery of the knee joint and  
30 health-related quality of life, all patients will complete Rasmussen functional score and  
31 Short-Form Health Survey (SF-36) questionnaires during the follow-up period. Scoring will  
32 be performed by two researchers who not involved in the initial treatment.

## 33 **Outcome measurements**

### 34 Primary outcome measure:

- 35 1. Knee functional recovery will be assessed by the Rasmussen functional score, which will be  
36 recorded at 3, 6, 12, and 24 months postoperatively.
- 37 2. Rasmussen radiological evaluation will be recorded immediately, and at 2 weeks and 1, 3, 6,  
38 12, and 24 months postoperatively.
- 39 3. The quality of reduction will be determined based on postoperative CT scans, which can  
40 directly measure the amount of residual depression, at 2 weeks and 1, 3, 6, 12, and 24 months  
41 postoperatively.

### 42 Secondary outcome measures:

- 43 1. Intraoperative blood loss will be recorded in the anesthesia records, and will include the blood  
44 in suction bottles (after subtracting the lavage fluid used during the surgery), and that in the

1 weighed sponges used during the operation.  
2  
3 2. Surgical duration.  
4  
5 3. The severity of lower limb pain after surgery will be assessed using a visual analog scale (VAS)  
6 pain score. The VAS scores of leg pain will be recorded from the day of the operation to the day of  
7 discharge from hospital (up to 2 weeks).  
8  
9 4. Hospitalization period after surgery.  
10  
11 5. Complications including wound infection (defined as minor, major, early, or late according to  
12 the criteria described by the Surgical Infection Study Group [22]), reoperations, and posttraumatic  
13 arthritis (PTA) will be recorded.  
14 PTA may not be seen in patients within the 24-month follow-up period, and we will perform  
15 follow-up for at least 10 years in all patients.

16 6. Health-related quality of life will be measured using the Short-Form Health Survey (SF-36)  
17 questionnaire during follow-up.

18 The SF-36 is a health-related quality of life questionnaire used to assess both the mental and  
19 physical health of the patient.

#### 20 **Baseline demographics**

21 Sex, age, body mass index (BMI), mechanism of injury, smoking status, alcohol use, and  
22 comorbidities (i.e., hypertension, diabetes, cardiopathy)

#### 23 **Follow-up**

24 Follow-up will be conducted at 2 weeks and 1, 3, 6, 12, and 24 months postoperatively.

#### 25 **Monitoring**

26 All investigators who have completed training are capable of independently collecting the data  
27 and assessing the clinical outcomes, and all electronic data will be recorded by an electronic data  
28 capture system (DAP Software Company, Beijing, China). Safety and data monitoring will be  
29 performed periodically during the study. All paper and electronic data will be stored for 10 years  
30 in the secure research archives at the Second Affiliated Hospital of Wenzhou Medical University,  
31 with restricted access.

#### 32 **Sample size calculation**

33 There have been no previous studies on which to base the sample size calculation. In a related  
34 study [21], the excellent Rasmussen radiological evaluation proportion of the control group was  
35 60%, and the proportion of the intervention group was 70%. We carried out power analysis to  
36 determine the sample size required to show safety with a type I error probability of 5% and an  
37 80% probability of avoiding a type II error. Using these assumptions, the required sample size is  
38 35 per group. With the assumption of a 12.5% loss to follow-up, we will include 40 participants  
39 per group.

#### 40 **Statistical analysis**

41 The trial data will be analyzed using SPSS for Windows software (ver. 19.0; SPSS Inc., Chicago,  
42 IL). For continuous variables, the Shapiro–Wilk test will be applied to determine if they follow a  
43 normal distribution. For normally distributed variables, the means will be calculated and compared  
44 using the independent samples *t* test (Student's *t* test); otherwise, the Mann–Whitney U test will be  
45 used for group comparisons. The chi-square test will be used to analyze qualitative variables. In  
46 all analyses,  $P < 0.05$  will be taken to indicate statistical significance.

#### 47 **Discussion**

48 There have been a number of reports describing treatment for tibial plateau fractures. In a

1  
2  
3 1 systematic review of the treatment of tibial plateau fractures, Metcalfe *et al.* [23] suggested that  
4 2 ORIF and external fixation are both acceptable strategies for managing bicondylar tibial plateau  
5 3 fractures, with no statistically significant differences found in the rates of complications between  
6 4 the two methods. In addition, after a systematic review of all studies reporting return to sport  
7 5 following tibial plateau fracture, Robertson *et al.* [24] reported that the rate of return to sport for  
8 6 the total cohort was 70%, versus 60% for those with fractures managed with ORIF and 83% for  
9 7 fractures treated with arthroscopic-assisted reduction internal fixation (OR 3.22, 95% CI:  
10 8 2.09–4.97,  $P < 0.001$ ).

11 9 An ideal treatment method for Schatzker II–IV tibial plateau fracture not only has to achieve  
12 10 anatomical restoration of the knee joint, but also rigid fixation to allow early postoperative  
13 11 rehabilitation [25]. Traditional ORIF requires extensive soft tissue dissection, which may lead to  
14 12 numerous negative outcomes such as slow wound healing, infection, and PTA [26]. Due to limited  
15 13 exposure, intraarticular lesions, such as meniscus or anterior cruciate ligament (ACL) injuries,  
16 14 cannot be diagnosed and treated properly [27]. Ruffolo *et al.* [28] reported that nonunion and deep  
17 15 infections occur commonly after ORIF, and long surgical durations are associated with higher  
18 16 rates of infection. With the development of arthroscopic techniques, arthroscopy-assisted  
19 17 reduction and internal fixation (ARIF) has been widely adopted in the treatment of tibial plateau  
20 18 fractures [29], and has shown good functional recovery and radiological results [30–32]. After  
21 19 comparing the Rasmussen and Hospital for Special Surgery knee-rating (HSS) scores between  
22 20 ARIF and ORIF, Dall'oca *et al.* [12] reported that the ARIF technique improved the clinical  
23 21 outcome in Schatzker type II–IV fractures. Balloon tibioplasty is an arthroscopic-assisted  
24 22 minimally invasive technique that creates a symmetrical, contained defect to hold bone filler for  
25 23 subchondral support; the balloon also allows eliminate the neurological and vascular risks of the  
26 24 conventional approach[20]. This technique has already been used for kyphoplasty and  
27 25 maxillofacial surgery, and has recently been applied for tibial plateau fractures [15,19,33].  
28 26 Mauffrey *et al.* [20] reported early positive results with arthroscopy-assisted balloon tibioplasty  
29 27 used as an alternative reduction method, and the method is gaining in acceptance. This paper  
30 28 describes the protocol for conducting an RCT in China that will investigate the efficacy of  
31 29 arthroscopic-assisted balloon tibioplasty in treating Schatzker II–IV tibial plateau fractures. The  
32 30 design of this trial included an ORIF group as a control group, to compare the clinical outcomes of  
33 31 Schatzker II–IV tibial plateau fractures with those of arthroscopic-assisted balloon tibioplasty  
34 32 fixation. Arthroscopic-assisted balloon tibioplasty is hypothesized to be superior in reducing  
35 33 surgical trauma, and to have better clinical outcomes in comparison with ORIF. This study is the  
36 34 first RCT to compare the outcomes of Schatzker II–IV tibial plateau fractures between  
37 35 arthroscopic-assisted balloon tibioplasty and traditional ORIF in China. If our hypothesis is  
38 36 confirmed, our results will be important for informing the scheduling and development of  
39 37 treatment options for Schatzker II–IV tibial plateau fracture surgery. We anticipate that the results  
40 38 will provide reliable evidence and clarify the value of arthroscopic-assisted balloon tibioplasty as  
41 39 a treatment for patients with Schatzker II–IV tibial plateau fractures.

#### 40 **Acknowledgements**

41 The authors thank the physiotherapists for their collaboration on establishing a postoperative  
42 42 rehabilitation therapy for all patients involved in this study.

#### 43 **Contributors**

44 Ji-Qi Wang helped to design the trial and wrote the manuscript. Bing-Jie Jiang helped to design



1 the trial. Wei-Jun Guo helped to conceive the trial and revised the manuscript. Wei-Jiang Zhang  
2 recruit the patients and conduct the trial. A-Bing Li will planned the statistical analysis. You-Ming  
3 Zhao helped to design the study and critically revised the manuscript. All authors read and  
4 approved the final manuscript.

#### 5 **Funding**

6 This work is supported by Clinical scientific research project of the Second Affiliated Hospital of  
7 the Wenzhou Medical University (SAHoWMU-CR2017-08-105).

8 The funders had no role in the design, execution or writing of the study.

#### 9 **Competing interests**

10 None declared.

#### 11 **Patient consent**

12 Obtained.

#### 13 **Ethics approval**

14 The study had been reviewed and approved by the ethics committee of the Second Affiliated  
15 Hospital of the Wenzhou Medical University, Wenzhou, China (batch: 2017-12).

#### 16 **References**

- 17 1. McNamara IR, Smith TO, Shepherd KL, Clark AB, Nielsen DM, Donell S, Hing CB (2015)  
18 Surgical fixation methods for tibial plateau fractures. The Cochrane database of systematic  
19 reviews (9):Cd009679. doi:10.1002/14651858.CD009679.pub2
- 20 2. Mayr R, Attal R, Zwierzina M, Blauth M, Schmoelz W (2015) Effect of additional fixation in  
21 tibial plateau impression fractures treated with balloon reduction and cement augmentation.  
22 Clinical biomechanics (Bristol, Avon) 30 (8):847-851. doi:10.1016/j.clinbiomech.2015.05.016
- 23 3. Honkonen SE (1994) Indications for surgical treatment of tibial condyle fractures. Clinical  
24 orthopaedics and related research (302):199-205
- 25 4. Maripuri SN, Rao P, Manoj-Thomas A, Mohanty K (2008) The classification systems for tibial  
26 plateau fractures: how reliable are they? Injury 39 (10):1216-1221.  
27 doi:10.1016/j.injury.2008.01.023
- 28 5. Doornberg JN, Rademakers MV, van den Bekerom MP, Kerkhoffs GM, Ahn J, Steller EP, Kloen  
29 P (2011) Two-dimensional and three-dimensional computed tomography for the classification and  
30 characterisation of tibial plateau fractures. Injury 42 (12):1416-1425.  
31 doi:10.1016/j.injury.2011.03.025
- 32 6. Chen P, Shen H, Wang W, Ni B, Fan Z, Lu H (2016) The morphological features of different  
33 Schatzker types of tibial plateau fractures: a three-dimensional computed tomography study.  
34 Journal of orthopaedic surgery and research 11 (1):94. doi:10.1186/s13018-016-0427-5
- 35 7. Chen HW, Liu GD, Wu LJ (2015) Clinical and radiological outcomes following  
36 arthroscopic-assisted management of tibial plateau fractures: a systematic review. Knee surgery,  
37 sports traumatology, arthroscopy : official journal of the ESSKA 23 (12):3464-3472.  
38 doi:10.1007/s00167-014-3256-2
- 39 8. Egol KA, Cantlon M, Fisher N, Broder K, Reisgo A (2017) Percutaneous Repair of a Schatzker  
40 III Tibial Plateau Fracture Assisted by Arthroscopy. Journal of orthopaedic trauma 31 Suppl  
41 3:S12-s13. doi:10.1097/bot.0000000000000892
- 42 9. Craiovan BS, Keshmiri A, Springorum R, Grifka J, Renkawitz T (2014) [Minimally invasive  
43 treatment of depression fractures of the tibial plateau using balloon repositioning and tibioplasty:  
44 video article]. Der Orthopade 43 (10):930-933. doi:10.1007/s00132-014-3019-2



- 1  
2  
3 10. Gavaskar AS, Gopalan H, Tummala NC, Srinivasan P (2016) The extended posterolateral  
4 approach for split depression lateral tibial plateau fractures extending into the posterior column: 2  
5 years follow up results of a prospective study. *Injury* 47 (7):1497-1500.  
6 doi:10.1016/j.injury.2016.04.021  
7  
8 11. Morin V, Pailhe R, Sharma A, Rouchy RC, Cognault J, Rubens-Duval B, Saragaglia D (2016)  
9 Moore I postero-medial articular tibial fracture in alpine skiers: Surgical management and return  
10 to sports activity. *Injury* 47 (6):1282-1287. doi:10.1016/j.injury.2016.03.024  
11  
12 12. Dall'oca C, Maluta T, Lavini F, Bondi M, Micheloni GM, Bartolozzi P (2012) Tibial plateau  
13 fractures: compared outcomes between ARIF and ORIF. *Strategies in trauma and limb*  
14 *reconstruction (Online)* 7 (3):163-175. doi:10.1007/s11751-012-0148-1  
15  
16 13. Kampa J, Dunlay R, Sikka R, Swiontkowski M (2016) Arthroscopic-Assisted Fixation of  
17 Tibial Plateau Fractures: Patient-Reported Postoperative Activity Levels. *Orthopedics* 39  
18 (3):e486-491. doi:10.3928/01477447-20160427-03  
19  
20 14. Lasanianos NG, Garnavos C, Magnisalis E, Kourkoulis S, Babis GC (2013) A comparative  
21 biomechanical study for complex tibial plateau fractures: nailing and compression bolts versus  
22 modern and traditional plating. *Injury* 44 (10):1333-1339. doi:10.1016/j.injury.2013.03.013  
23  
24 15. Pizanis A, Garcia P, Pohlemann T, Burkhardt M (2012) Balloon tibioplasty: a useful tool for  
25 reduction of tibial plateau depression fractures. *Journal of orthopaedic trauma* 26 (7):e88-93.  
26 doi:10.1097/BOT.0b013e31823a8dc8  
27  
28 16. Ziogas K, Tourvas E, Galanakis I, Kouvidis G (2015) Arthroscopy Assisted Balloon  
29 Osteoplasty of a Tibia Plateau Depression Fracture: A Case Report. *North American journal of*  
30 *medical sciences* 7 (9):411-414. doi:10.4103/1947-2714.166223  
31  
32 17. Jentzsch T, Fritz Y, Veit-Haibach P, Schmitt J, Sprengel K, Werner CM (2015) Osseous vitality  
33 in single photon emission computed tomography/computed tomography (SPECT/CT) after  
34 balloon tibioplasty of the tibial plateau: a case series. *BMC medical imaging* 15:56.  
35 doi:10.1186/s12880-015-0091-y  
36  
37 18. Di Caprio F, Buda R, Ghermandi R, Ferruzzi A, Timoncini A, Parma A, Giannini S (2010)  
38 Combined arthroscopic treatment of tibial plateau and intercondylar eminence avulsion fractures.  
39 *The Journal of bone and joint surgery American volume* 92 Suppl 2:161-169.  
40 doi:10.2106/jbjs.j.00812  
41  
42 19. Ollivier M, Turati M, Munier M, Lunebourg A, Argenson JN, Parratte S (2016) Balloon  
43 tibioplasty for reduction of depressed tibial plateau fractures: Preliminary radiographic and  
44 clinical results. *International orthopaedics* 40 (9):1961-1966. doi:10.1007/s00264-015-3047-5  
45  
46 20. Mauffrey C, Roberts G, Cuellar DO, Herbert B, Hak D (2014) Balloon tibioplasty: pearls and  
47 pitfalls. *The journal of knee surgery* 27 (1):31-37. doi:10.1055/s-0033-1363516  
48  
49 21. Elabjer E, Bencic I, Cuti T, Cerovecki T, Curic S, Vidovic D (2017) Tibial plateau fracture  
50 management: arthroscopically-assisted versus ORIF procedure - clinical and radiological  
51 comparison. *Injury* 48 Suppl 5:S61-s64. doi:10.1016/s0020-1383(17)30742-8  
52  
53 22. Peel AL, Taylor EW (1991) Proposed definitions for the audit of postoperative infection: a  
54 discussion paper. *Surgical Infection Study Group. Annals of the Royal College of Surgeons of*  
55 *England* 73 (6):385-388  
56  
57 23. Metcalfe D, Hickson CJ, McKee L, Griffin XL (2015) External versus internal fixation for  
58 bicondylar tibial plateau fractures: systematic review and meta-analysis. *Journal of orthopaedics*  
59 *and traumatology : official journal of the Italian Society of Orthopaedics and Traumatology* 16  
60

- 1 (4):275-285. doi:10.1007/s10195-015-0372-9
24. Robertson GAJ, Wong SJ, Wood AM (2017) Return to sport following tibial plateau fractures: A systematic review. *World journal of orthopedics* 8 (7):574-587. doi:10.5312/wjo.v8.i7.574
25. Rossi R, Bonasia DE, Blonna D, Assom M, Castoldi F (2008) Prospective follow-up of a simple arthroscopic-assisted technique for lateral tibial plateau fractures: results at 5 years. *The Knee* 15 (5):378-383. doi:10.1016/j.knee.2008.04.001
26. Rademakers MV, Kerkhoffs GM, Sierevelt IN, Raaymakers EL, Marti RK (2007) Operative treatment of 109 tibial plateau fractures: five- to 27-year follow-up results. *Journal of orthopaedic trauma* 21 (1):5-10. doi:10.1097/BOT.0b013e31802c5b51
27. Chen XZ, Liu CG, Chen Y, Wang LQ, Zhu QZ, Lin P (2015) Arthroscopy-assisted surgery for tibial plateau fractures. *Arthroscopy : the journal of arthroscopic & related surgery : official publication of the Arthroscopy Association of North America and the International Arthroscopy Association* 31 (1):143-153. doi:10.1016/j.arthro.2014.06.005
28. Ruffolo MR, Gettys FK, Montijo HE, Seymour RB, Karunakar MA (2015) Complications of high-energy bicondylar tibial plateau fractures treated with dual plating through 2 incisions. *Journal of orthopaedic trauma* 29 (2):85-90. doi:10.1097/bot.0000000000000203
29. Chan YS, Yuan LJ, Hung SS, Wang CJ, Yu SW, Chen CY, Chao EK, Lee MS (2003) Arthroscopic-assisted reduction with bilateral buttress plate fixation of complex tibial plateau fractures. *Arthroscopy : the journal of arthroscopic & related surgery : official publication of the Arthroscopy Association of North America and the International Arthroscopy Association* 19 (9):974-984
30. Chiu CH, Cheng CY, Tsai MC, Chang SS, Chen AC, Chen YJ, Chan YS (2013) Arthroscopy-assisted reduction of posteromedial tibial plateau fractures with buttress plate and cannulated screw construct. *Arthroscopy : the journal of arthroscopic & related surgery : official publication of the Arthroscopy Association of North America and the International Arthroscopy Association* 29 (8):1346-1354. doi:10.1016/j.arthro.2013.05.003
31. Ruiz-Iban MA, Diaz-Heredia J, Elias-Martin E, Moros-Marco S, Cebreiro Martinez Del Val I (2012) Repair of meniscal tears associated with tibial plateau fractures: a review of 15 cases. *The American journal of sports medicine* 40 (10):2289-2295. doi:10.1177/0363546512457552
32. Gill TJ, Moezzi DM, Oates KM, Sterett WI (2001) Arthroscopic reduction and internal fixation of tibial plateau fractures in skiing. *Clinical orthopaedics and related research* (383):243-249
33. Doria C, Balsano M, Spiga M, Mosele GR, Puddu L, Caggiari G (2017) Tibioplasty, a new technique in the management of tibial plateau fracture: A multicentric experience review. *Journal of orthopaedics* 14 (1):176-181. doi:10.1016/j.jor.2016.12.002

37 Figure 1. Flow chart showing the steps in participant recruitment, treatment and analysis. balloon  
38 tibioplasty, arthroscopic assisted balloon tibioplasty group; ORIF, open reduction and internal  
39 fixation group.



Flow chart showing the steps in participant recruitment, treatment and analysis. balloon tibioplasty, arthroscopic assisted balloon tibioplasty group; ORIF, open reduction and internal fixation group.

189x170mm (300 x 300 DPI)

## supplementary information

title: Arthroscopic-assisted balloon tibioplasty versus open reduction internal fixation (ORIF) for treatment of Schatzker II–IV tibial plateau fractures: Study protocol of a randomized controlled trial

Ji-Qi Wang<sup>1</sup>, Bing-Jie Jiang<sup>1</sup>, Wei-Jun Guo<sup>1</sup>, Wei-Jiang Zhang<sup>1</sup>, A-Bing Li<sup>1</sup>, You-Ming Zhao<sup>1</sup>

Institutional affiliations:

<sup>1</sup>Department of Orthopaedics, The Second Affiliated Hospital of Wenzhou Medical University, 109#

Xue Yuan Xi Road, Wenzhou, Zhejiang, China, 325000.

**Corresponding author:** You-Ming Zhao, E-mail: [wmuorthopaedic@sina.com](mailto:wmuorthopaedic@sina.com)

supplementary information, S1

CT scan of Schatzker II to IV tibial plateau fractures, which conform to our inclusion criteria.



1, CT scan of Schatzker II tibial plateau fracture, which include the lateral platform split and depression (left limb); 2, CT scan of Schatzker III tibial plateau fracture, which only include the lateral tibial plateau depression (left limb); 3, CT scan of Schatzker IV tibial plateau fracture, which only include the medial tibial plateau depression (left limb).

1  
2  
3 supplementary information, S2

4  
5 Simulated the operation process of Schatzker III tibial plateau fracture with Mimics software



34 1, The black arrowhead in the figure points to the depression of the lateral tibial plateau; 2, Three  
35 Kirschner wires and the balloon are placed below the depressed fragment under fluoroscopy  
36 (anteroposterior); 3, Three Kirschner wires and balloon are placed below the depressed fragment  
37 under fluoroscopy (laterolateral); 4, The balloon slowly inflated with contrast solution, and the  
38 depression of the lateral tibial plateau will be anatomical reduction (anteroposterior); 5, The balloon  
39 slowly inflated with contrast solution, and the depression of the lateral tibial plateau will be  
40 anatomical reduction (laterolateral). After removal of the balloon, calcium phosphate cement will  
41 injected into the cavity produced by the balloon under fluoroscopic guidance, ensuring there is no  
42 excessive cement overflow into the tibial medullary cavity.  
43  
44  
45  
46  
47  
48  
49  
50  
51  
52  
53  
54  
55  
56  
57  
58  
59  
60



SPIRIT 2013 Checklist: Recommended items to address in a clinical trial protocol and related documents\*

| Section/item                      | Item No | Description                                                                                                                                                                                                                                                                              |
|-----------------------------------|---------|------------------------------------------------------------------------------------------------------------------------------------------------------------------------------------------------------------------------------------------------------------------------------------------|
| <b>Administrative information</b> |         |                                                                                                                                                                                                                                                                                          |
| Title (P1)                        | 1       | Descriptive title identifying the study design, population, interventions, and, if applicable, trial acronym                                                                                                                                                                             |
| Trial registration (P1)           | 2a      | Trial identifier and registry name. If not yet registered, name of intended registry                                                                                                                                                                                                     |
|                                   | 2b      | All items from the World Health Organization Trial Registration Data Set                                                                                                                                                                                                                 |
| Protocol version (Not mentioned)  | 3       | Date and version identifier                                                                                                                                                                                                                                                              |
| Funding (P7)                      | 4       | Sources and types of financial, material, and other support                                                                                                                                                                                                                              |
| Roles and responsibilities (P6)   | 5a      | Names, affiliations, and roles of protocol contributors                                                                                                                                                                                                                                  |
|                                   | 5b      | Name and contact information for the trial sponsor                                                                                                                                                                                                                                       |
|                                   | 5c      | Role of study sponsor and funders, if any, in study design; collection, management, analysis, and interpretation of data; writing of the report; and the decision to submit the report for publication, including whether they will have ultimate authority over any of these activities |
|                                   | 5d      | Composition, roles, and responsibilities of the coordinating centre, steering committee, endpoint adjudication committee, data management team, and other individuals or groups overseeing the trial, if applicable (see Item 21a for data monitoring committee)                         |
| <b>Introduction</b>               |         |                                                                                                                                                                                                                                                                                          |
| Background and rationale (P2)     | 6a      | Description of research question and justification for undertaking the trial, including summary of relevant studies (published and unpublished) examining benefits and harms for each intervention                                                                                       |
|                                   | 6b      | Explanation for choice of comparators                                                                                                                                                                                                                                                    |
| Objectives (P6)                   | 7       | Specific objectives or hypotheses                                                                                                                                                                                                                                                        |

1  
2  
3  
4  
5  
6  
7  
8  
9  
10  
11  
12  
13  
14  
15  
16  
17  
18  
19  
20  
21  
22  
23  
24  
25  
26  
27  
28  
29  
30  
31  
32  
33  
34  
35  
36  
37  
38  
39  
40  
41  
42  
43  
44  
45  
46  
47  
48  
49  
50  
51  
52  
53  
54  
55  
56  
57  
58  
59  
60

Trial design (P2) 8 Description of trial design including type of trial (eg, parallel group, crossover, factorial, single group), allocation ratio, and framework (eg, superiority, equivalence, noninferiority, exploratory)

### Methods: Participants, interventions, and outcomes

Study setting (P2) 9 Description of study settings (eg, community clinic, academic hospital) and list of countries where data will be collected. Reference to where list of study sites can be obtained

Eligibility criteria (P3) 10 Inclusion and exclusion criteria for participants. If applicable, eligibility criteria for study centres and individuals who will perform the interventions (eg, surgeons, psychotherapists)

Interventions (P3-P4) 11a Interventions for each group with sufficient detail to allow replication, including how and when they will be administered

11b Criteria for discontinuing or modifying allocated interventions for a given trial participant (eg, drug dose change in response to harms, participant request, or improving/worsening disease)

11c Strategies to improve adherence to intervention protocols, and any procedures for monitoring adherence (eg, drug tablet return, laboratory tests)

11d Relevant concomitant care and interventions that are permitted or prohibited during the trial

Outcomes (P4-P5) 12 Primary, secondary, and other outcomes, including the specific measurement variable (eg, systolic blood pressure), analysis metric (eg, change from baseline, final value, time to event), method of aggregation (eg, median, proportion), and time point for each outcome. Explanation of the clinical relevance of chosen efficacy and harm outcomes is strongly recommended

Participant timeline (P3) 13 Time schedule of enrolment, interventions (including any run-ins and washouts), assessments, and visits for participants. A schematic diagram is highly recommended (see Figure)

Sample size (P5) 14 Estimated number of participants needed to achieve study objectives and how it was determined, including clinical and statistical assumptions supporting any sample size calculations

Recruitment (P5) 15 Strategies for achieving adequate participant enrolment to reach target sample size

### Methods: Assignment of interventions (for controlled trials)

Allocation:



|    |                 |     |                                                                         |
|----|-----------------|-----|-------------------------------------------------------------------------|
| 1  |                 |     |                                                                         |
| 2  | Sequence        | 16a | Method of generating the allocation sequence (eg, computer-             |
| 3  | generation (P3) |     | generated random numbers), and list of any factors for stratification.  |
| 4  |                 |     | To reduce predictability of a random sequence, details of any planned   |
| 5  |                 |     | restriction (eg, blocking) should be provided in a separate document    |
| 6  |                 |     | that is unavailable to those who enrol participants or assign           |
| 7  |                 |     | interventions                                                           |
| 8  |                 |     |                                                                         |
| 9  | Allocation      | 16b | Mechanism of implementing the allocation sequence (eg, central          |
| 10 | concealment     |     | telephone; sequentially numbered, opaque, sealed envelopes),            |
| 11 | mechanism       |     | describing any steps to conceal the sequence until interventions are    |
| 12 | (P3)            |     | assigned                                                                |
| 13 |                 |     |                                                                         |
| 14 | Implementation  | 16c | Who will generate the allocation sequence, who will enrol participants, |
| 15 | (P3)            |     | and who will assign participants to interventions                       |
| 16 |                 |     |                                                                         |
| 17 | Blinding        | 17a | Who will be blinded after assignment to interventions (eg, trial        |
| 18 | (masking) (P3)  |     | participants, care providers, outcome assessors, data analysts), and    |
| 19 |                 |     | how                                                                     |
| 20 |                 |     |                                                                         |
| 21 |                 | 17b | If blinded, circumstances under which unblinding is permissible, and    |
| 22 |                 |     | procedure for revealing a participant's allocated intervention during   |
| 23 |                 |     | the trial                                                               |
| 24 |                 |     |                                                                         |
| 25 |                 |     |                                                                         |

### Methods: Data collection, management, and analysis

|    |                 |     |                                                                          |
|----|-----------------|-----|--------------------------------------------------------------------------|
| 26 |                 |     |                                                                          |
| 27 |                 |     |                                                                          |
| 28 | Data collection | 18a | Plans for assessment and collection of outcome, baseline, and other      |
| 29 | methods (P4)    |     | trial data, including any related processes to promote data quality (eg, |
| 30 |                 |     | duplicate measurements, training of assessors) and a description of      |
| 31 |                 |     | study instruments (eg, questionnaires, laboratory tests) along with      |
| 32 |                 |     | their reliability and validity, if known. Reference to where data        |
| 33 |                 |     | collection forms can be found, if not in the protocol                    |
| 34 |                 |     |                                                                          |
| 35 |                 | 18b | Plans to promote participant retention and complete follow-up,           |
| 36 |                 |     | including list of any outcome data to be collected for participants who  |
| 37 |                 |     | discontinue or deviate from intervention protocols                       |
| 38 |                 |     |                                                                          |
| 39 | Data            | 19  | Plans for data entry, coding, security, and storage, including any       |
| 40 | management (P5) |     | related processes to promote data quality (eg, double data entry;        |
| 41 |                 |     | range checks for data values). Reference to where details of data        |
| 42 |                 |     | management procedures can be found, if not in the protocol               |
| 43 |                 |     |                                                                          |
| 44 |                 |     |                                                                          |
| 45 | Statistical     | 20a | Statistical methods for analysing primary and secondary outcomes.        |
| 46 | methods (P5)    |     | Reference to where other details of the statistical analysis plan can be |
| 47 |                 |     | found, if not in the protocol                                            |
| 48 |                 |     |                                                                          |
| 49 |                 | 20b | Methods for any additional analyses (eg, subgroup and adjusted           |
| 50 |                 |     | analyses)                                                                |
| 51 |                 |     |                                                                          |
| 52 |                 | 20c | Definition of analysis population relating to protocol non-adherence     |
| 53 |                 |     | (eg, as randomised analysis), and any statistical methods to handle      |
| 54 |                 |     | missing data (eg, multiple imputation)                                   |
| 55 |                 |     |                                                                          |
| 56 |                 |     |                                                                          |
| 57 |                 |     |                                                                          |
| 58 |                 |     |                                                                          |
| 59 |                 |     |                                                                          |
| 60 |                 |     |                                                                          |

## Methods: Monitoring

|                         |     |                                                                                                                                                                                                                                                                                                                                       |
|-------------------------|-----|---------------------------------------------------------------------------------------------------------------------------------------------------------------------------------------------------------------------------------------------------------------------------------------------------------------------------------------|
| Data monitoring<br>(P5) | 21a | Composition of data monitoring committee (DMC); summary of its role and reporting structure; statement of whether it is independent from the sponsor and competing interests; and reference to where further details about its charter can be found, if not in the protocol. Alternatively, an explanation of why a DMC is not needed |
|                         | 21b | Description of any interim analyses and stopping guidelines, including who will have access to these interim results and make the final decision to terminate the trial                                                                                                                                                               |
| Harms (P5)              | 22  | Plans for collecting, assessing, reporting, and managing solicited and spontaneously reported adverse events and other unintended effects of trial interventions or trial conduct                                                                                                                                                     |
| Auditing (P5)           | 23  | Frequency and procedures for auditing trial conduct, if any, and whether the process will be independent from investigators and the sponsor                                                                                                                                                                                           |

## Ethics and dissemination

|                                               |     |                                                                                                                                                                                                                                  |
|-----------------------------------------------|-----|----------------------------------------------------------------------------------------------------------------------------------------------------------------------------------------------------------------------------------|
| Research ethics approval (P6)                 | 24  | Plans for seeking research ethics committee/institutional review board (REC/IRB) approval                                                                                                                                        |
| Protocol amendments (Not mentioned)           | 25  | Plans for communicating important protocol modifications (eg, changes to eligibility criteria, outcomes, analyses) to relevant parties (eg, investigators, REC/IRBs, trial participants, trial registries, journals, regulators) |
| Consent or assent (P7)                        | 26a | Who will obtain informed consent or assent from potential trial participants or authorised surrogates, and how (see Item 32)                                                                                                     |
|                                               | 26b | Additional consent provisions for collection and use of participant data and biological specimens in ancillary studies, if applicable                                                                                            |
| Confidentiality (P5)                          | 27  | How personal information about potential and enrolled participants will be collected, shared, and maintained in order to protect confidentiality before, during, and after the trial                                             |
| Declaration of interests (P7)                 | 28  | Financial and other competing interests for principal investigators for the overall trial and each study site                                                                                                                    |
| Access to data (P5)                           | 29  | Statement of who will have access to the final trial dataset, and disclosure of contractual agreements that limit such access for investigators                                                                                  |
| Ancillary and post-trial care (Not mentioned) | 30  | Provisions, if any, for ancillary and post-trial care, and for compensation to those who suffer harm from trial participation                                                                                                    |

|                                                             |                              |                           |                                                                                                                                                                                                                                                                                                                                                                                                                                                                                                  |
|-------------------------------------------------------------|------------------------------|---------------------------|--------------------------------------------------------------------------------------------------------------------------------------------------------------------------------------------------------------------------------------------------------------------------------------------------------------------------------------------------------------------------------------------------------------------------------------------------------------------------------------------------|
| 1<br>2<br>3<br>4<br>5<br>6<br>7<br>8<br>9<br>10<br>11<br>12 | Dissemination<br>policy (P5) | 31a<br><br>31b<br><br>31c | Plans for investigators and sponsor to communicate trial results to participants, healthcare professionals, the public, and other relevant groups (eg, via publication, reporting in results databases, or other data sharing arrangements), including any publication restrictions<br><br>Authorship eligibility guidelines and any intended use of professional writers<br><br>Plans, if any, for granting public access to the full protocol, participant-level dataset, and statistical code |
|-------------------------------------------------------------|------------------------------|---------------------------|--------------------------------------------------------------------------------------------------------------------------------------------------------------------------------------------------------------------------------------------------------------------------------------------------------------------------------------------------------------------------------------------------------------------------------------------------------------------------------------------------|

### Appendices

|                                                                                                                                                                                                                                  |                                                  |    |                                                                                                                                                                                                |
|----------------------------------------------------------------------------------------------------------------------------------------------------------------------------------------------------------------------------------|--------------------------------------------------|----|------------------------------------------------------------------------------------------------------------------------------------------------------------------------------------------------|
| 13<br>14<br>15<br>16<br>17<br>18<br>19<br>20<br>21<br>22                                                                                                                                                                         | Informed consent<br>materials (Not<br>mentioned) | 32 | Model consent form and other related documentation given to participants and authorised surrogates                                                                                             |
| 23<br>24<br>25<br>26<br>27<br>28<br>29<br>30<br>31<br>32<br>33<br>34<br>35<br>36<br>37<br>38<br>39<br>40<br>41<br>42<br>43<br>44<br>45<br>46<br>47<br>48<br>49<br>50<br>51<br>52<br>53<br>54<br>55<br>56<br>57<br>58<br>59<br>60 | Biological<br>specimens (Not<br>applicable)      | 33 | Plans for collection, laboratory evaluation, and storage of biological specimens for genetic or molecular analysis in the current trial and for future use in ancillary studies, if applicable |

---

\*It is strongly recommended that this checklist be read in conjunction with the SPIRIT 2013 Explanation & Elaboration for important clarification on the items. Amendments to the protocol should be tracked and dated. The SPIRIT checklist is copyrighted by the SPIRIT Group under the Creative Commons "[Attribution-NonCommercial-NoDerivs 3.0 Unported](https://creativecommons.org/licenses/by-nc-nd/3.0/)" license.
